# Supplementary material
Source: PubMed Central journal article supplement (PMC6179451)
Supplement: cs8b02326_si_001.pdf [file cs8b02326_si_001.pdf]

## Supporting information

### H<sub>2</sub>O<sub>2</sub> Oxidation by Fe<sup>III</sup>-OOH Intermediates and its Impact on Catalytic Efficiency

Juan Chen,<sup>†</sup> Apparao Draksharapu,<sup>†, #</sup> Davide Angelone,<sup>†, †</sup> Duenpen Unjaroen,<sup>†</sup> Sandeep K. Padamati,<sup>†</sup> Ronald Hage,<sup>‡</sup> Marcel Swart,<sup>‡, †</sup> Carole Duboc,<sup>§</sup> Wesley R. Browne<sup>†,\*</sup>

<sup>†</sup> Molecular Inorganic Chemistry, Stratingh Institute for Chemistry, Faculty of Science and Engineering, University of Groningen, Nijenborgh 4, 9747AG, Groningen, The Netherlands

<sup>‡</sup> Catexel BV, BioPartner Center, Galileiweg 8, 2333 BD Leiden, The Netherlands

<sup>†</sup> Institut de Química Computacional i Catàlisi (IQCC), Departament de Química, Universitat de Girona, Campus Montilivi, E17003 Girona, Catalonia, Spain.

<sup>†</sup> ICREA, Pg. Lluís Companys 23, 08010 Barcelona, Spain

<sup>§</sup> Département de Chimie Moléculaire, Univ. Grenoble Alpes/CNRS, UMR-5250, BP-53, 38041 Grenoble Cedex 9, France

#### Present Address

<sup>#</sup>(A.D): Department of Chemistry and Center for Metals in Biocatalysis, 207 Pleasant St. SE, University of Minnesota, Minneapolis, Minnesota 55455, United States

w.r.browne@rug.nl

## Contents

|                                                                                                            |    |
|------------------------------------------------------------------------------------------------------------|----|
| 1. Simulation of the EPR spectra.....                                                                      | 3  |
| 2. Colorimetric quantification of formaldehyde.....                                                        | 3  |
| 3. Quantification of O <sub>2</sub> by head space Raman spectroscopy.....                                  | 4  |
| 4. Raman spectroscopy for the second-order-rate constant determination of disproportionation reaction..... | 7  |
| 5. Additional spectroscopic and electrochemical data.....                                                  | 9  |
| 6. Supplementary data for DFT calculations.....                                                            | 19 |
| 6.1 Absolute energies for all the structures.....                                                          | 20 |
| 6.2 Optimized geometries for all the structures.....                                                       | 22 |
| References.....                                                                                            | 34 |

## 1. Simulation of the EPR spectra

Simulation of the EPR spectra was performed using the EasySpin package (version 5.1., option pepper) based on the exact numerical solution of the spin Hamiltonian of the singlet spin state for singlet molecules oriented randomly in the solid phase.<sup>1</sup> The initial parameters for calculating the EPR spectrum of  $[(\text{N4Py})\text{Fe}^{\text{III}}(\text{OOH})]^{2+}$  were  $S = \frac{1}{2}$ ,  $g = [2.1620, 2.1095, 1.983]$ , line width  $\Delta H = 0.85$  mT, of  $[(\text{N4Py})\text{Fe}^{\text{III}}(\text{OCH}_3)]^{2+}$  were  $S = \frac{1}{2}$ ,  $g = [2.2929, 2.1246, 1.9638]$ ,  $\Delta H = 1.3$  mT, and of  $[(\text{N4Py})\text{Fe}^{\text{III}}(\text{OOX})]^{2+}$  were  $S = \frac{1}{2}$ ,  $g = [2.17903, 2.1288, 1.98]$ , line width  $\Delta H = 1.0$  mT. The temperature was 77 K, and the frequency  $\nu_0 = 9.462846$  GHz.

## 2. Colorimetric quantification of formaldehyde

The formation of formaldehyde was quantified as described in literature.<sup>2</sup> The colorimetric reagent was prepared by dissolving  $\text{NH}_4\text{OAc}$  (15 g, 0.19 mol), acetic acid (0.3 mL, 5.4 mol) and pentane-2,4-dione (0.2 mL, 1.9 mol) in 100 mL water. Take 1 mL reaction solution, diluted 10 times (1 mL solution dissolved in 9 mL water, concentration of formaldehyde should not exceed 8  $\mu\text{g}$  of formaldehyde per mL), then mixed with the other 10 mL of colorimetric reagent. The mixture was put into a 31 °C water bath. Every 2 min, 1 mL mixture was transferred to the cuvette and check the UV-vis absorbance at 420 nm, after around 35 min, the absorbance will reach to its maximum and stable for ca. 10 min. This maximum absorbance was used to calculate the concentration of formaldehyde using equation (1).

$$C = \frac{A_{420\text{nm}}}{L \times \epsilon_{420\text{nm}}} \times 20 \quad (1)$$

Where C is the concentration of formaldehyde in the reaction,  $A_{420\text{nm}}$  is the maximum absorbance of the mixture at 420 nm, L is the pathlength of the cuvette,  $\epsilon_{420\text{nm}}$  is the molar absorptivity of diacetyldihydro-lutidine (DDL), which was determined by calibration curve with solutions containing known amounts of formaldehyde.

### 3. Quantification of O<sub>2</sub> by head space Raman spectroscopy

The formation of oxygen was quantified by head space Raman spectroscopy as follows:

4 mL volume cuvette was used with 2 mL of the reaction mixture and hence the headspace volume was 2 mL. Under standard conditions and taking the mole fractions of oxygen and nitrogen in the atmosphere as ca. 0.21 and 0.78. The number of O<sub>2</sub> and N<sub>2</sub> molecules is

$$n_{O_2} = \frac{2 \times 10^{-3} L \times 21\%}{22.4 L} \times N_A = 0.1129 \times 10^{20}$$

$$n_{N_2} = \frac{2 \times 10^{-3} L \times 78\%}{22.4 L} \times N_A = 0.419 \times 10^{20}$$

Before addition of H<sub>2</sub>O<sub>2</sub>, the ratio of Raman intensity of O<sub>2</sub> (1553 cm<sup>-1</sup>) and N<sub>2</sub> (2239 cm<sup>-1</sup>) stretching modes is 3700/9095.

After addition of H<sub>2</sub>O<sub>2</sub>, O<sub>2</sub> is released continuously from the reaction mixture, manifested in an increase in relative intensity of the band at 1553 cm<sup>-1</sup> with respect to the band at 2239 cm<sup>-1</sup>. The Raman scattering intensity changed from 3600 to ca. 13600 (with no change in the intensity of the N<sub>2</sub> band) and remained constant thereafter.

Hence the number of molecules of O<sub>2</sub> in the headspace after the reaction is

$$n'_{O_2} = 0.1129 \times 10^{20} \times \frac{13600}{3700} = 0.4041 \times 10^{20}$$

Which is an increase of

$$\Delta n_{O_2} = 0.4041 \times 10^{20} - 0.1129 \times 10^{20} = 0.2912 \times 10^{20}$$

Considering the solubility of O<sub>2</sub> in methanol changes with the increase partial pressure of O<sub>2</sub>, the partial pressure is proportional to the molar fraction, so the final partial pressure of O<sub>2</sub> is

$$\frac{0.4041 \times 10^{20}}{0.419 \times 10^{20} + 0.4041 \times 10^{20}} = 0.491$$

Using Henry's law, the solubility of O<sub>2</sub> is proportional to the partial pressure of O<sub>2</sub>, and at 20 °C, and the molar fraction solubility of O<sub>2</sub> in methanol is <sup>3,4</sup>

$$x_1 = \frac{n_{O_2}}{n_{O_2} + n_{CH_3OH}} = 4.15 \times 10^{-4}$$

([dx.doi.org/10.1021/jie502386t](https://doi.org/10.1021/jie502386t); J. Phys. Chem. Ref. Data, Vol. 12, No. 2, 1983)

$$C_{[mL/L]} = \frac{x_1 \times 4.689 \times 10^{20}}{V_T^\circ}$$

$x_1$ , molar fraction

$V_T^\circ$ , molar volume of a pure solvent at room temperature T, at room temperature, for methanol,

$$V_T^\circ = 40.7403 \text{ cm}^3/\text{mol}$$

$C_{[mL/L]}$ , number of mL of gas at STP from air dissolved in 1 L of solvent

therefore,

$$C = 47.76 \text{ mL/L}, \text{ and then } C = 0.04776 \text{ mL/mL},$$

And at the end of the reaction, due to the increase in the mole fraction of O<sub>2</sub>, from 0.21 to 0.491, solubility increased to

$$C = 0.04776 \text{ mL/mL} \times \frac{0.491}{0.21} = 0.116 \text{ mL/mL}$$

the dissolved O<sub>2</sub> in methanol is

$$x = \frac{(0.116 - 0.04776) \times 2 \times 10^{-3} \text{ L}}{22.4 \text{ L}} \times N_A = 0.0367 \times 10^{20}$$

Together with the consideration of solubility changes, the actually released number of O<sub>2</sub> molecules is

$$0.2912 \times 10^{20} + 0.0367 \times 10^{20} = 0.3279 \times 10^{20}$$

And hence corresponds to 28% of the H<sub>2</sub>O<sub>2</sub> undergoing disproportionation.

Since the concentration of H<sub>2</sub>O<sub>2</sub> was 200 mM, if all H<sub>2</sub>O<sub>2</sub> is consumed by disproportionation will generate

$$n = 100 \times 10^{-3} \frac{\text{mole}}{\text{L}} \times 2 \times 10^{-3} \text{ L} \times N_A = 1.205 \times 10^{20}$$

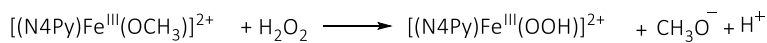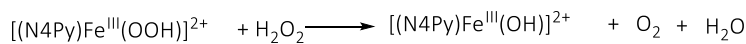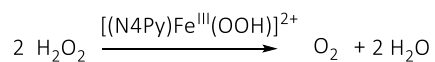

So the efficiency was calculated as

$$\frac{0.3279 \times 10^{20}}{1.205 \times 10^{20}} = 27.21\%$$

#### 4. Raman spectroscopy for the second-order-rate constant determination of disproportionation reaction.

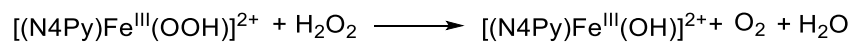

This reaction rate was determined by Raman spectroscopy.  $H_2O_2$  (200 mM) was added to **1** (0.125 to 1.0 mM) in methanol at 21 °C, at first 1000 to 7000 s (depended on the concentration of **1**), the concentration of  $Fe^{III}$ -OOH is almost constant, and decay of  $H_2O_2$  was monitored by Raman spectroscopy.

$$-\frac{d[H_2O_2]}{dt} = k[Fe^{III}(OOH)][H_2O_2]$$

in which,  $[Fe^{III}$ -OOH] is almost constant during the decay region of  $H_2O_2$ , note the detection limitation of  $H_2O_2$  is around 25 - 50 mM, even at the end of the decay from Raman spectra, the concentration of  $H_2O_2$  remains above 25 mM, which is far more than the concentration of  $Fe^{III}$ -OOH, so the pseudo-first-order condition is satisfied during the measurement time region.

so

$$-\frac{d[H_2O_2]}{dt} = \{k[Fe^{III}(OOH)]\}[H_2O_2]$$

$$-\frac{d[H_2O_2]}{dt} = k_{obs}[H_2O_2]$$

rearrangement

$$-\frac{d[H_2O_2]}{[H_2O_2]} = k_{obs}dt$$

integrate

$$-\frac{d[H_2O_2]}{[H_2O_2]} = k_{obs}dt$$

$$-\int_{[H_2O_2]_0}^{[H_2O_2]_t} \frac{d[H_2O_2]}{[H_2O_2]} = \int_0^t k_{obs}dt$$

$$-\ln \frac{[H_2O_2]_t}{[H_2O_2]_0} = k_{obs} dt$$

so

$$[H_2O_2]_t = [H_2O_2]_0 e^{-k_{obs} dt}$$

since,

$$k_{obs} = k [Fe^{III}(OOH)]$$

The second order rate constant can be obtained by the linear plot of  $k_{obs}$  with concentration of  $Fe^{III}$ -OOH.



## 5. Additional spectroscopic and electrochemical data

Dissolution of **1** in methanol results in large changes to spectroscopic properties, consistent with substitution of the CH<sub>3</sub>CN ligand for methanol or methoxide. As in water, the acidity of the bound methanol is expected to be such that a mixture of methoxido and methanol bound complexes are formed, however, for simplicity, only the Fe(II)-OMe complex is referred to in the text as complex **2**.

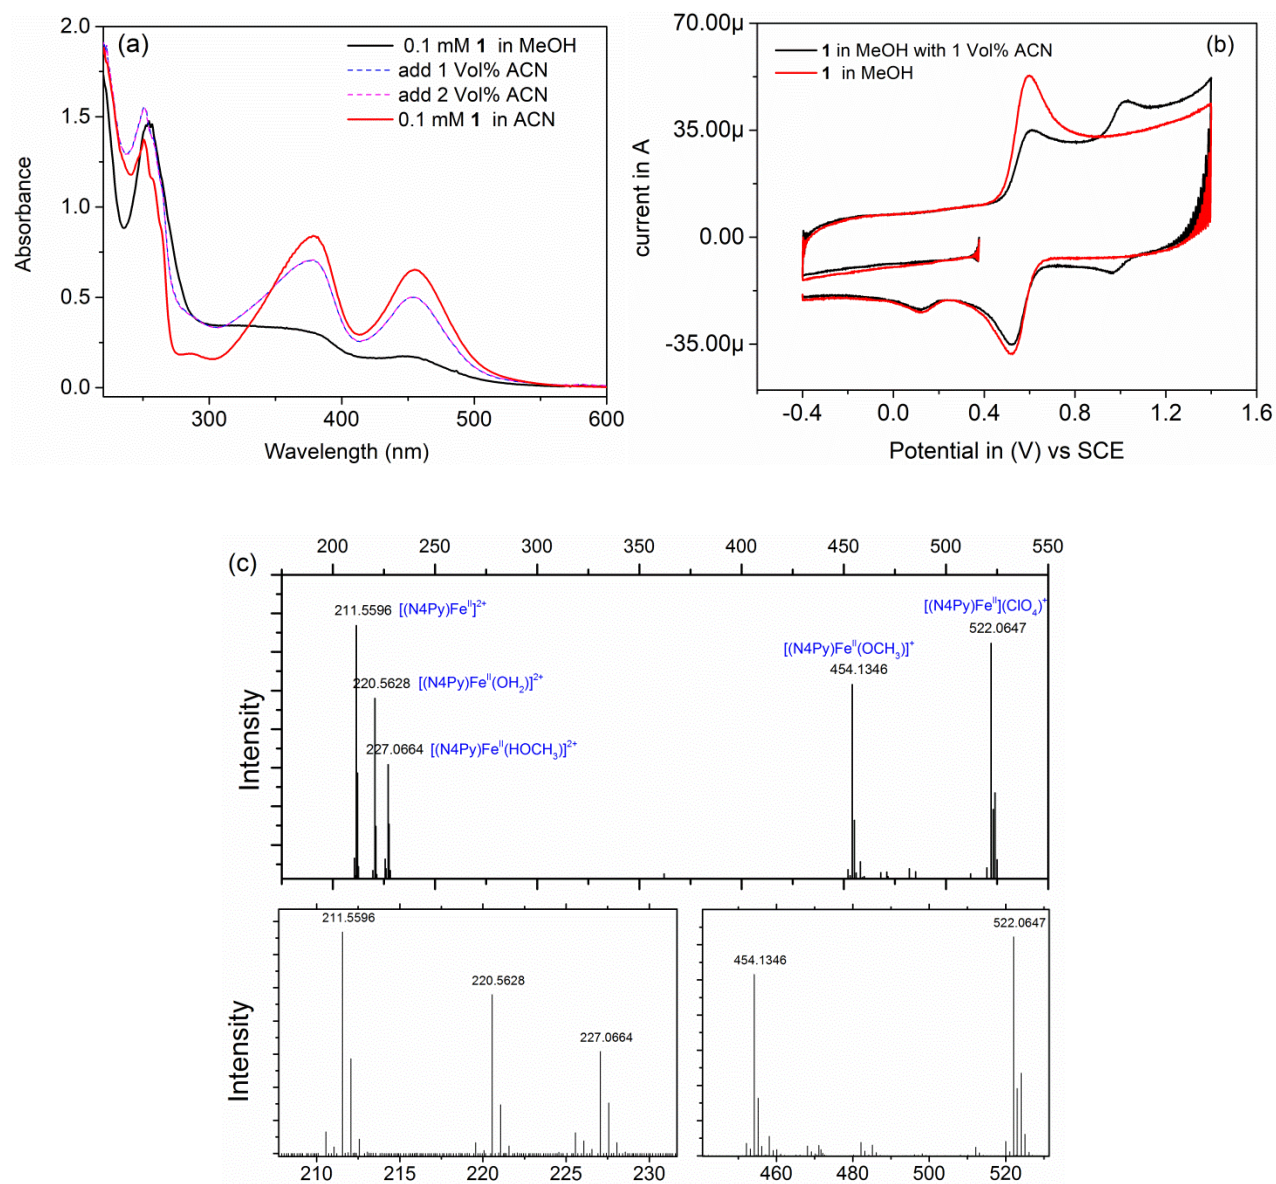

**Figure S 1.** (a) UV-vis absorption spectrum of **1** (0.1 mM) in methanol and in acetonitrile and after addition of acetonitrile to a solution of **1** in methanol (dash lines); (b) Cyclic voltammetry of **1** (1 mM) in methanol (0.1 M TBAOTf, tetrabutylammonium triflate) (red line) and after addition of 1 vol % acetonitrile (black line). Scan rate 100 mV/s. (c) ESI-Mass spectrum of complex **1** in methanol.

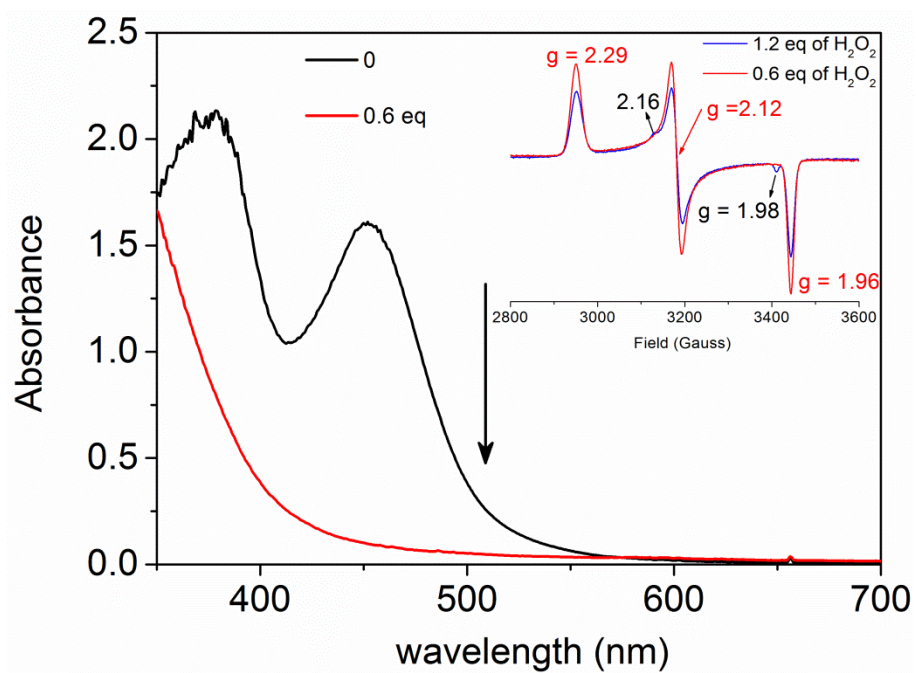

**Figure S 2.** UV-vis absorption spectrum of **1** (1 mM) in methanol (black) after addition of 0.6 equiv. H<sub>2</sub>O<sub>2</sub> (red); Inset shows the X-band EPR spectra for the flash frozen sample of corresponding reaction solution at 77 K.

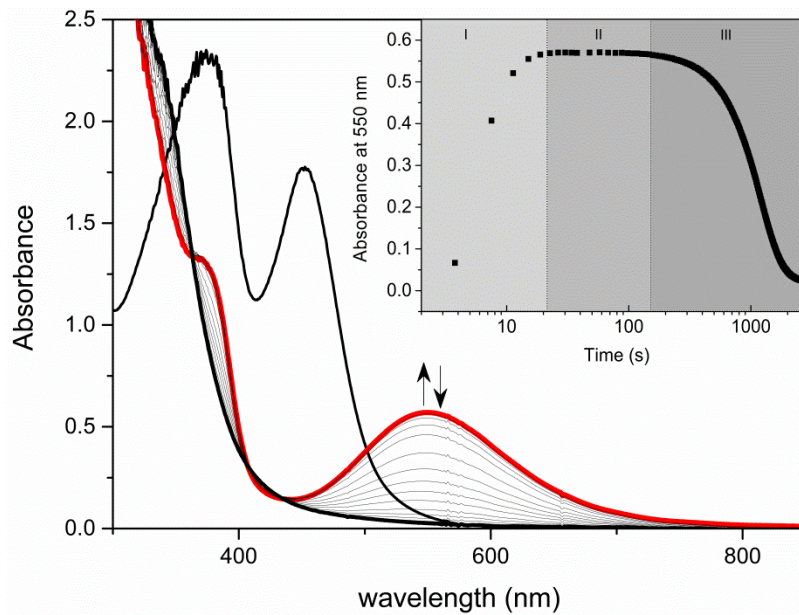

**Figure S 3.** UV-vis absorption spectrum of **1** (0.5 mM) upon addition of 50 equiv. H<sub>2</sub>O<sub>2</sub>. Inset is the corresponding absorbance at 550 nm over time.

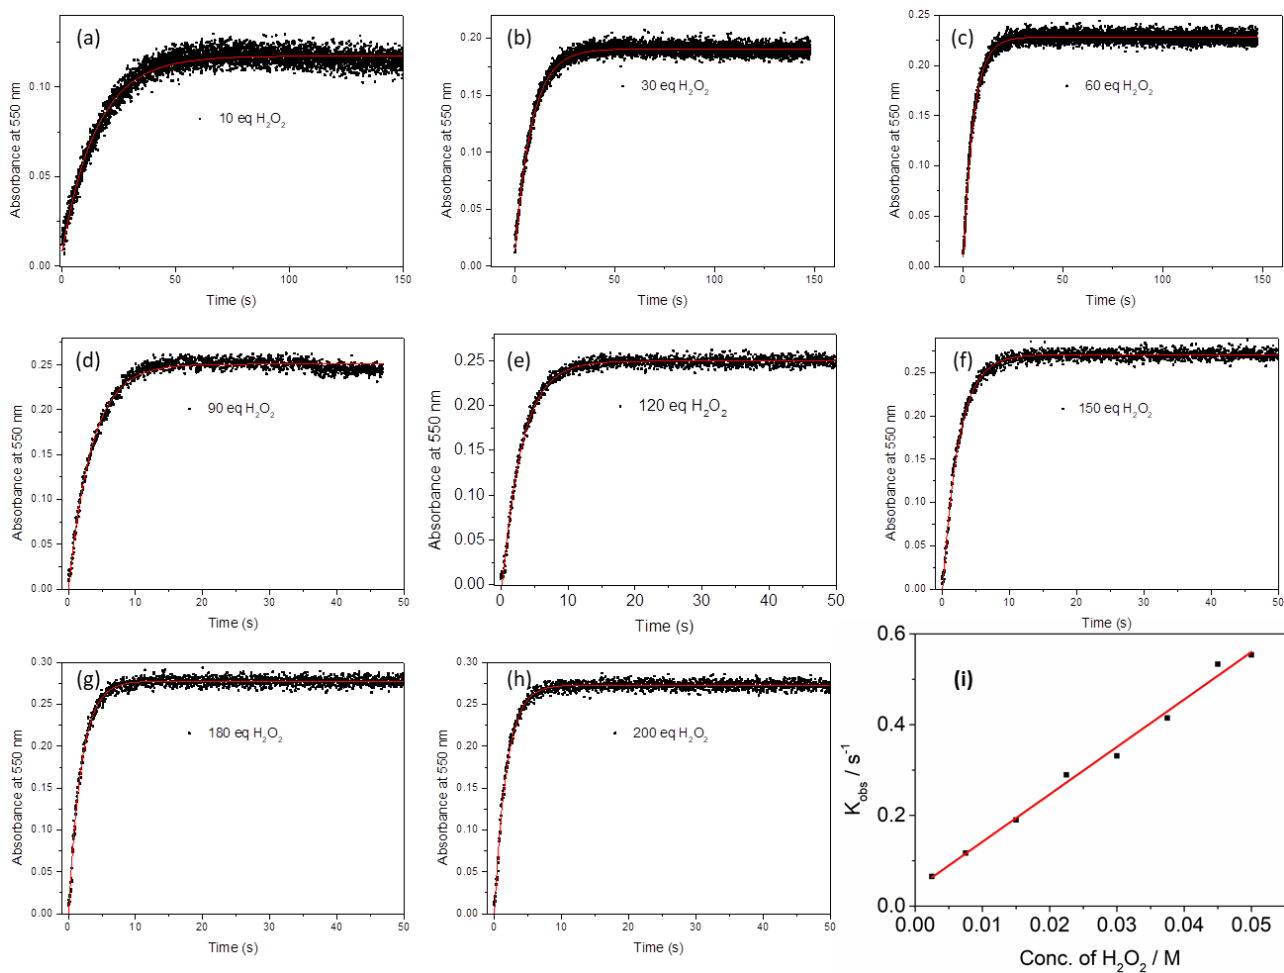

**Figure S 4.** (a) Absorbance at 550 nm over time after addition of H<sub>2</sub>O<sub>2</sub> (2.5 mM to 50 mM) to **1** (0.25 mM) in methanol. (a) 2.5 mM; (b) 7.5 mM; (c) 15 mM; (d) 22.5 mM; (e) 30 mM; (f) 37.5 mM; (g) 45 mM; (h) 50 mM; and (i)  $k_{\text{obs}}$  vs [H<sub>2</sub>O<sub>2</sub>].

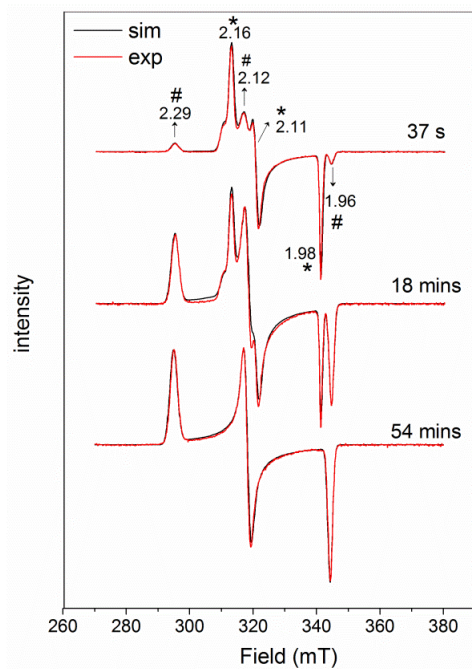

**Figure S 5.** X-band EPR spectra (recorded at 77 K) of the reaction mixture of **1** (1 mM) with 50 equiv. H<sub>2</sub>O<sub>2</sub> in methanol. (top) EPR spectrum 37 s after addition of H<sub>2</sub>O<sub>2</sub>, (middle) 18 min after addition, (bottom) after complete decay of Fe<sup>III</sup>-OOH (54 min). Experimental data is shown as red lines and simulations as black lines. Microwave Frequency 9.46 GHz, Power 63.5 mW.

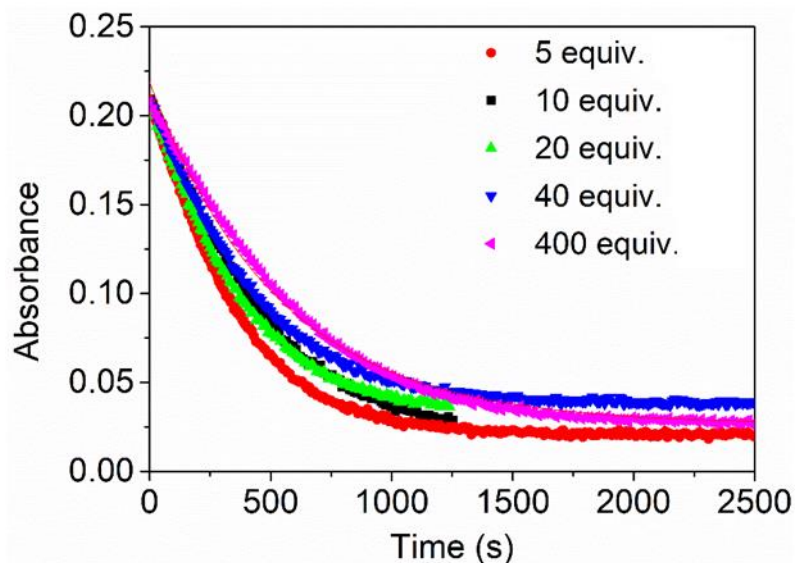

**Figure S 6.** The decay of  $[(\text{N4Py})\text{Fe}^{\text{III}}(\text{OOH})]^{2+}$  after the absorbance at 550 nm decrease to 0.2, of the reaction of **1** (0.56 mM) with  $\text{H}_2\text{O}_2$  (2.5 to 50 mM, see legend) in methanol at 21 °C.

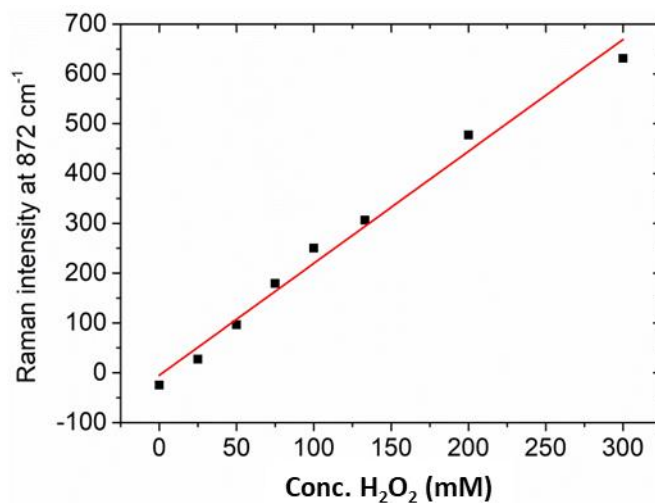

**Figure S 7.** Calibration curve for Raman intensity at  $872\text{ cm}^{-1}$  ( $\lambda_{\text{exc}} 785\text{ nm}$ , at 21 °C) with respect to concentration of  $\text{H}_2\text{O}_2$ . Commercially available  $\text{H}_2\text{O}_2$  (50 wt% in water, verified by iodometric titration) was diluted in methanol as appropriate. Raman intensity is relative to solvent (methanol) bands and stability of the solutions verified by continuous monitoring over > 30 min.

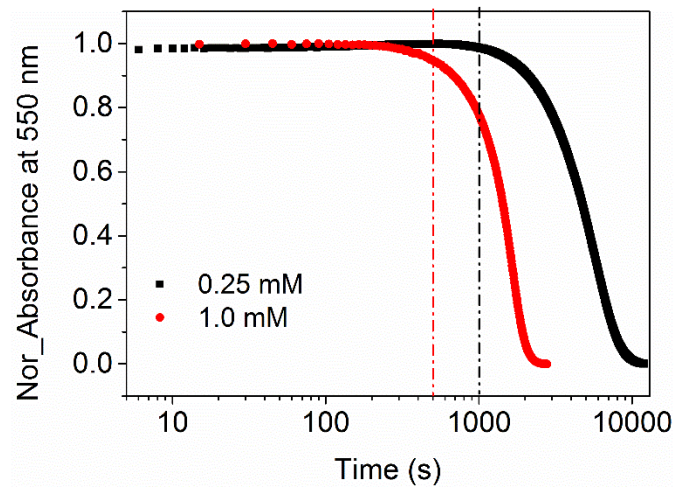

**Figure S 8.** Normalized UV-vis absorbance at 550 nm of reaction of **1** (1 mM in red, 0.25 mM in black) with H<sub>2</sub>O<sub>2</sub> (200 mM) at 21 °C.

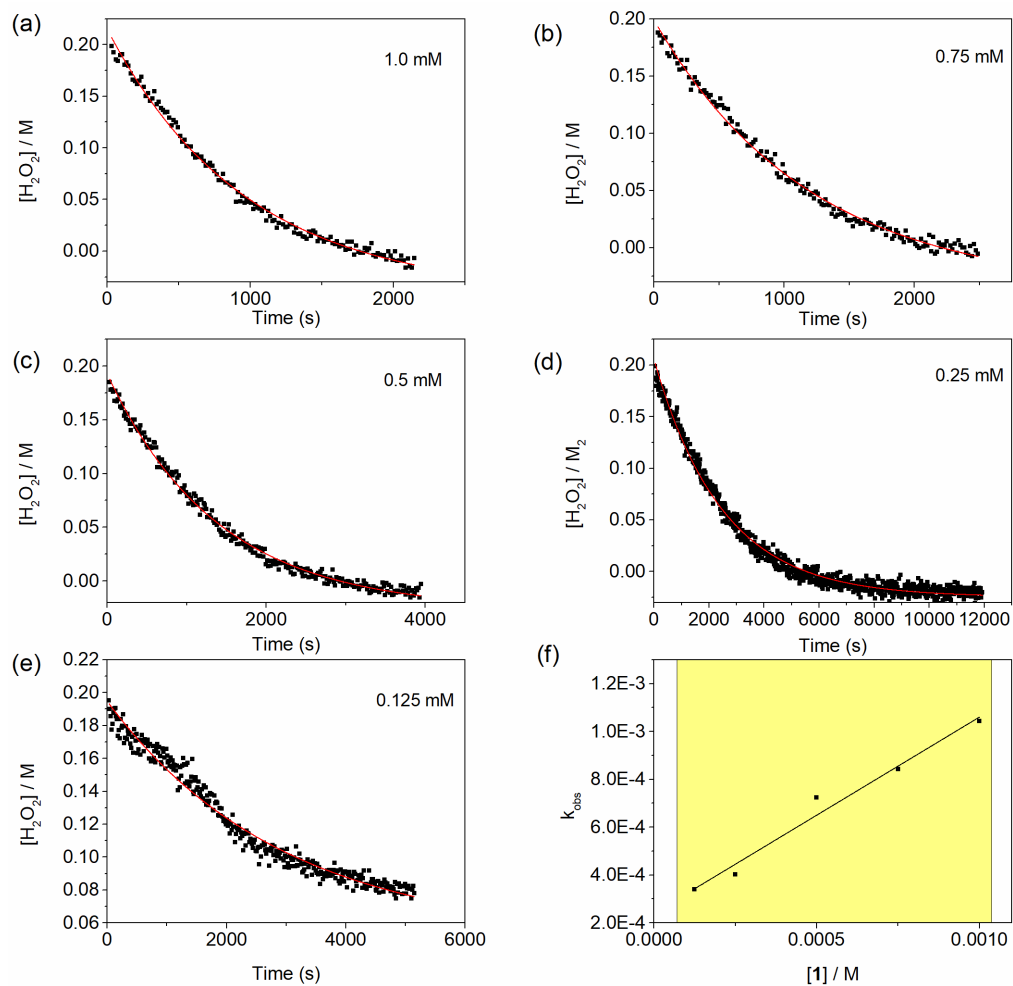

**Figure S 9.** (a-e) Decrease in the concentration of H<sub>2</sub>O<sub>2</sub> in methanol with time following addition of H<sub>2</sub>O<sub>2</sub> (200 mM) to **1** (0.25 mM) at 21 °C, (see Figure S10 for calibration curve). (f) Plot of the pseudo-first-order rate  $k_{obs}$  versus concentration of **1** in M.



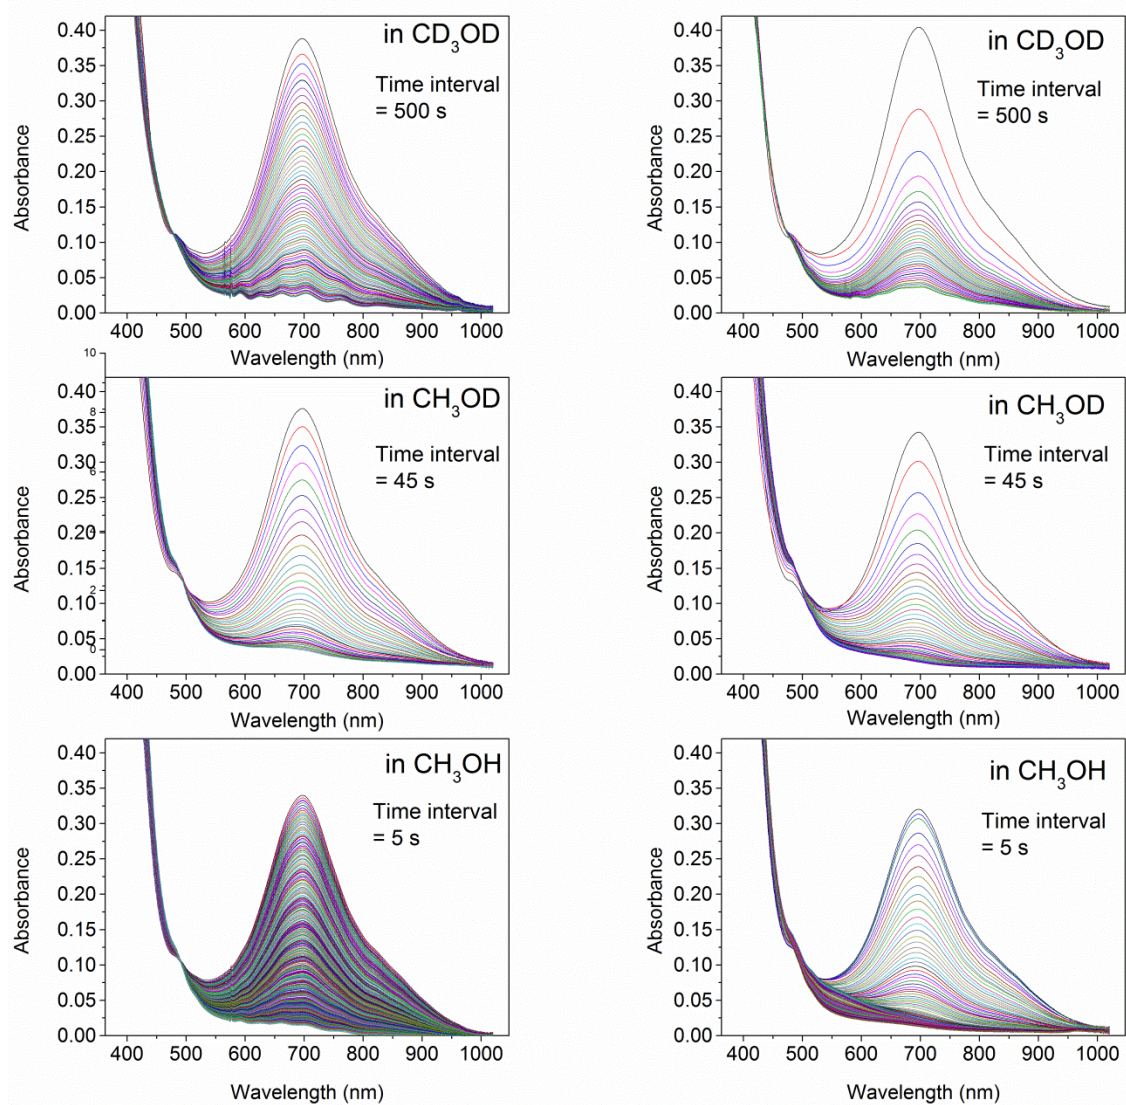

**Figure S 10.** (Left) UV-vis absorption spectra of **4** (1 mM) in CH<sub>3</sub>OH, CH<sub>3</sub>OD, and CD<sub>3</sub>OD. (Right) UV-vis absorption spectra of **4** (1 mM) after addition of 1 equiv. H<sub>2</sub>O<sub>2</sub> in CH<sub>3</sub>OH, CH<sub>3</sub>OD, and CD<sub>3</sub>OD.

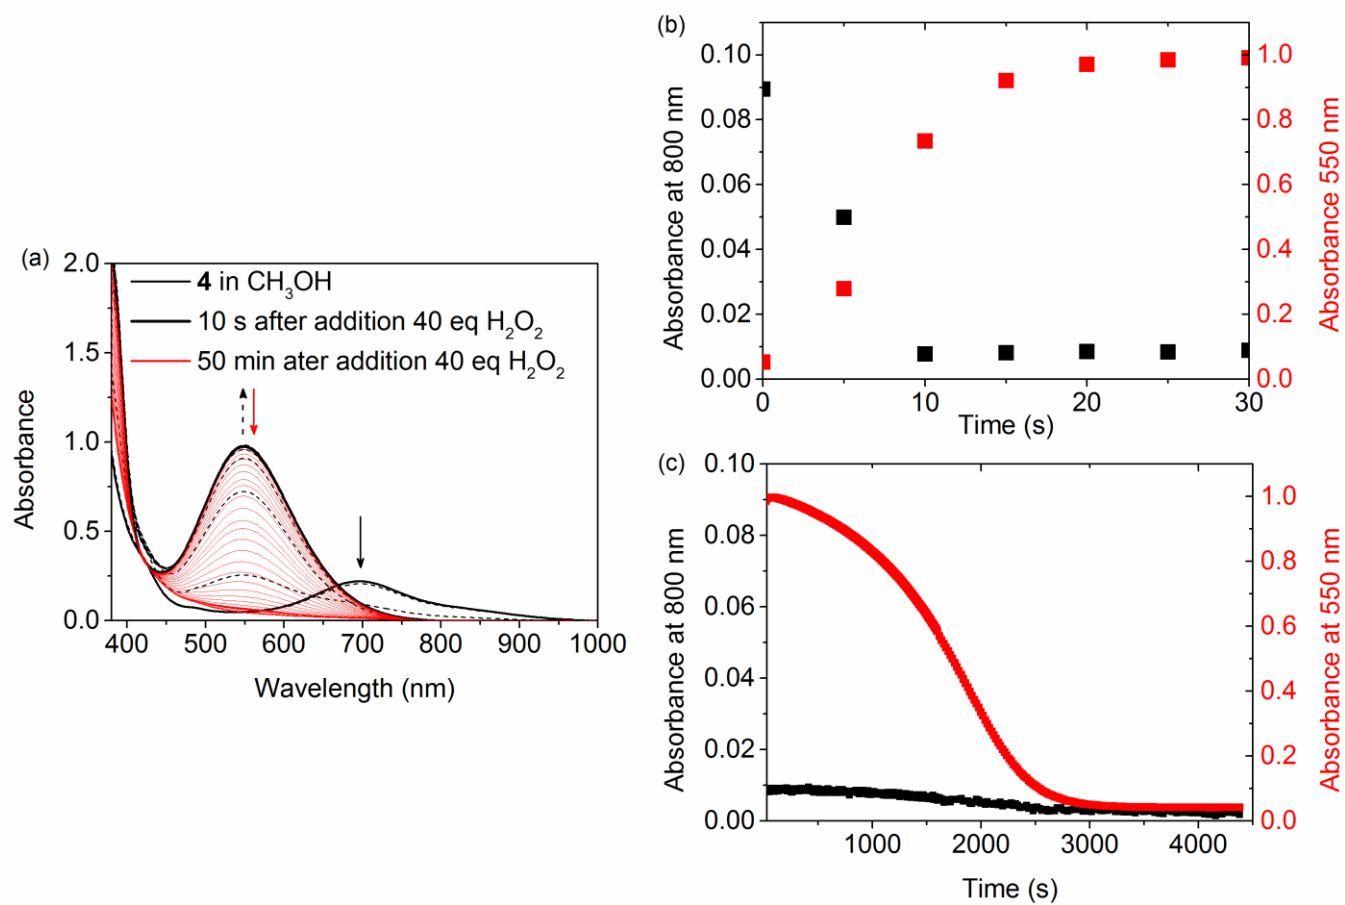

**Figure S 11.** (a) UV-vis absorption spectrum of **4** (0.5 mM) after addition of 40 equiv.  $\text{H}_2\text{O}_2$  in  $\text{CH}_3\text{OH}$ . The change in absorbance at 550 nm (black) and 800 nm (red) between 0 ~150 s (b) and the change after 150 s (c) are shown separately.

## 6. Supplementary data for DFT calculations

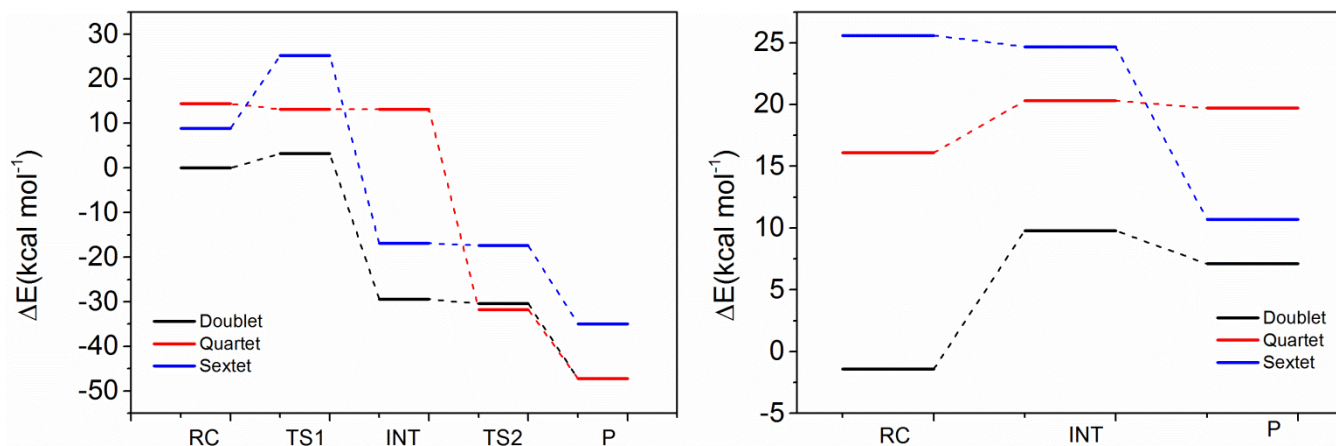

**Figure S 12.** Comparison of energy profiles (in kcal mol<sup>-1</sup>) of pathway a (left) and pathway b (right) in different spin states: doublet (black), quartet (red) and sextet (blue), as obtained at the S12g/TZ2P//BP86-D<sub>3</sub>/TDZP level.

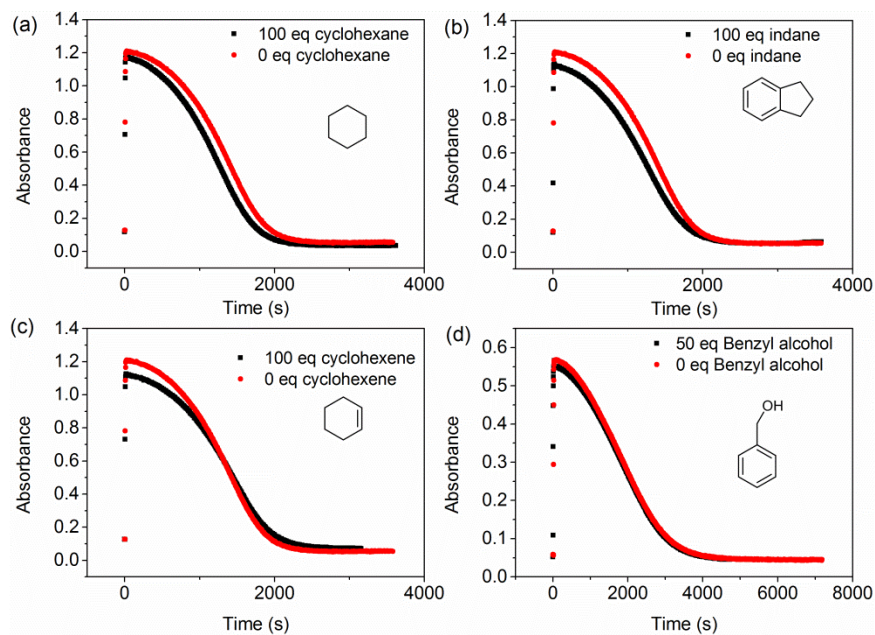

**Figure S 13.** Time-dependence of absorbance at 550 nm in the reaction of **1** (1 mM) with 50 equiv. H<sub>2</sub>O<sub>2</sub> in methanol (red traces) at 21 °C: and (black traces) (a) with 100 equiv. cyclohexane added prior to H<sub>2</sub>O<sub>2</sub>, (b) with 100 equiv. indane added prior to H<sub>2</sub>O<sub>2</sub>, (c) with 100 equiv. cyclohexene added prior to H<sub>2</sub>O<sub>2</sub>, and (d) with 50 equiv. benzyl alcohol added immediately after maximum absorbance at 550 nm was reached.

If there is a reaction between Fe<sup>III</sup>-OOH with substrates, the rate of decay is expected to be influenced (increased rate), however, as shown here, the rate of decay of the Fe<sup>III</sup>-OOH is insensitive to the addition of a range of substrates. We note in Figure S 13, that benzyl alcohol has no effect while it reacts rapidly with the Fe(IV)=O complex.<sup>5</sup> Hence we confirm that the direct reaction between Fe<sup>III</sup>-OOH and other substrates does not take place.

## 6.1 Absolute energies for all the structures.

**Table S 1.** Absolute S12g/TZ2P//BP86-D<sub>3</sub>/TDZP level energies (kcal mol<sup>-1</sup>) of optimized geometry for pathway a (catalase) in ADF.

|                         | E_el_BP86-D3 | G_el_BP86-D3 | Free energy corrections | E_el_S12g | G_S12g   |        |
|-------------------------|--------------|--------------|-------------------------|-----------|----------|--------|
| <sup>2</sup> <b>RC</b>  | -8169.24     | -7928.98     | 240.26                  | -8374.53  | -8134.27 | 0.0    |
| <sup>4</sup> <b>RC</b>  | -8143.06     | -7904.60     | 238.46                  | -8358.37  | -8119.91 | 14.36  |
| <sup>6</sup> <b>RC</b>  | -8136.42     | -7899.73     | 236.69                  | -8362.09  | -8125.40 | 8.87   |
| <sup>2</sup> <b>TS1</b> | -8163.88     | -7925.41     | 238.47                  | -8369.55  | -8131.07 | 3.2    |
| <sup>4</sup> <b>TS1</b> | -8140.12     | -7901.49     | 238.63                  | -8359.69  | -8121.06 | 13.21  |
| <sup>6</sup> <b>TS1</b> | -8129.73     | -7893.17     | 236.56                  | -8345.60  | -8109.04 | 25.23  |
| <sup>2</sup> <b>INT</b> | -8189.12     | -7951.36     | 237.76                  | -8401.27  | -8163.51 | -29.4  |
| <sup>4</sup> <b>INT</b> | -8150.58     | -7913.54     | 237.04                  | -8358.11  | -8121.07 | 13.21  |
| <sup>6</sup> <b>INT</b> | -8165.03     | -7930.27     | 234.76                  | -8385.94  | -8151.18 | -16.91 |
| <sup>2</sup> <b>TS2</b> | -8187.69     | -7952.25     | 235.44                  | -8400.12  | -8164.68 | -30.41 |
| <sup>4</sup> <b>TS2</b> | -8189.33     | -7953.65     | 235.68                  | -8401.60  | -8165.92 | -31.65 |
| <sup>6</sup> <b>TS2</b> | -8127.60     | -7892.99     | 234.61                  | -8386.26  | -8151.65 | -17.38 |
| <sup>2</sup> <b>P</b>   | -8203.20     | -7965.73     | 237.47                  | -8418.88  | -8181.41 | -47.41 |
| <sup>4</sup> <b>P</b>   | -8202.85     | -7965.52     | 237.33                  | -8418.81  | -8181.48 | -47.21 |
| <sup>6</sup> <b>P</b>   | -8178.64     | -7943.76     | 234.88                  | -8404.08  | -8169.20 | -34.93 |

**Table S 2.** Absolute S12g/TZ2P//BP86-D<sub>3</sub>/TDZP level energies (kcal mol<sup>-1</sup>) of optimized geometry for pathway b (homolysis) in ADF.

|                                         | E_el_BP86-D3 | G_el_BP86-D3 | Free energy corrections | E_el_S12g | G_S12g   |       |
|-----------------------------------------|--------------|--------------|-------------------------|-----------|----------|-------|
| <sup>2</sup> <b>RC</b> <sub>homo</sub>  | -8169.54     | -7929.46     | 240.08                  | -8375.78  | -8135.70 | 0.0   |
| <sup>4</sup> <b>RC</b> <sub>homo</sub>  | -8140.70     | -7902.72     | 237.98                  | -8356.12  | -8118.14 | 16.13 |
| <sup>6</sup> <b>RC</b> <sub>homo</sub>  | -8126.49     | -7892.01     | 234.48                  | -8343.12  | -8108.64 | 25.63 |
| <sup>2</sup> <b>TSI</b> <sub>homo</sub> | -8154.59     | -7917.22     | 237.37                  | -8362.39  | -8125.02 | 10.68 |
| <sup>4</sup> <b>TSI</b> <sub>homo</sub> | -8138.63     | -7901.29     | 237.34                  | -8351.28  | -8113.94 | 20.33 |
| <sup>6</sup> <b>TSI</b> <sub>homo</sub> | -8124.93     | -7889.47     | 235.46                  | -8345.06  | -8109.60 | 24.67 |
| <sup>2</sup> <b>P</b> <sub>homo</sub>   | -8159.70     | -7921.72     | 237.98                  | -8365.11  | -8127.13 | 8.57  |
| <sup>4</sup> <b>P</b> <sub>homo</sub>   | -8144.34     | -7904.96     | 239.38                  | -8358.15  | -8118.77 | 19.70 |
| <sup>6</sup> <b>P</b> <sub>homo</sub>   | -8136.27     | -7899.43     | 236.84                  | -8360.45  | -8123.61 | 10.66 |

## 6.2 Optimized geometries for all the structures

**Table S 3.** XYZ coordinates of optimized geometries.

| <sup>2</sup> RC |              |              |              | <sup>4</sup> RC |              |              |              |
|-----------------|--------------|--------------|--------------|-----------------|--------------|--------------|--------------|
| C               | 1.021800000  | 2.520500000  | 1.505600000  | C               | 1.750500000  | -2.190200000 | -1.695000000 |
| C               | 1.719600000  | 3.722300000  | 1.454800000  | C               | 2.687200000  | -3.215200000 | -1.635200000 |
| C               | 2.325100000  | 4.111500000  | 0.262600000  | C               | 3.251000000  | -3.549700000 | -0.406600000 |
| C               | 2.216900000  | 3.293000000  | -0.863200000 | C               | 2.863300000  | -2.856200000 | 0.741900000  |
| C               | 1.509100000  | 2.111400000  | -0.742300000 | C               | 1.921700000  | -1.852200000 | 0.613300000  |
| N               | 0.934700000  | 1.732500000  | 0.424100000  | N               | 1.384200000  | -1.523700000 | -0.589400000 |
| C               | 1.274700000  | 1.096300000  | -1.832500000 | C               | 1.419900000  | -0.983500000 | 1.740200000  |
| C               | 2.101800000  | -0.117700000 | -1.490200000 | C               | 2.083100000  | 0.371400000  | 1.597100000  |
| C               | 3.238500000  | -0.542700000 | -2.152300000 | C               | 3.085100000  | 0.847800000  | 2.425100000  |
| C               | 3.867100000  | -1.703800000 | -1.698200000 | C               | 3.603300000  | 2.117200000  | 2.156100000  |
| C               | 3.327500000  | -2.398300000 | -0.618300000 | C               | 3.097700000  | 2.853000000  | 1.087300000  |
| C               | 2.177900000  | -1.918200000 | 0.000100000  | C               | 2.086500000  | 2.303000000  | 0.302000000  |
| N               | 1.598300000  | -0.784500000 | -0.423200000 | N               | 1.603800000  | 1.079300000  | 0.554900000  |
| N               | -0.163400000 | 0.652000000  | -1.649200000 | N               | -0.053400000 | -0.775100000 | 1.473300000  |
| C               | -0.540700000 | -0.516300000 | -2.509600000 | C               | -0.676700000 | 0.262000000  | 2.360300000  |
| C               | -1.148200000 | 1.777500000  | -1.748200000 | C               | -0.823900000 | -2.063100000 | 1.518900000  |
| C               | -2.175600000 | 1.637700000  | -0.668300000 | C               | -2.020900000 | -1.939700000 | 0.623700000  |
| C               | -1.287800000 | -1.533900000 | -1.700600000 | C               | -1.611000000 | 1.131800000  | 1.576200000  |
| C               | -2.090400000 | -2.501600000 | -2.289100000 | C               | -2.677100000 | 1.784600000  | 2.178400000  |
| C               | -2.678700000 | -3.475600000 | -1.487300000 | C               | -3.466600000 | 2.643400000  | 1.417600000  |
| C               | -2.452200000 | -3.448300000 | -0.113700000 | C               | -3.167100000 | 2.823200000  | 0.069800000  |
| C               | -1.658100000 | -2.443900000 | 0.421300000  | C               | -2.101700000 | 2.126000000  | -0.481300000 |
| N               | -1.085100000 | -1.507000000 | -0.358700000 | N               | -1.336700000 | 1.294000000  | 0.252600000  |
| N               | -1.783900000 | 0.945000000  | 0.429700000  | N               | -1.761800000 | -1.335200000 | -0.556500000 |
| C               | -2.616300000 | 0.820500000  | 1.479600000  | C               | -2.747400000 | -1.165800000 | -1.451300000 |
| C               | -3.875100000 | 1.404800000  | 1.476300000  | C               | -4.042500000 | -1.606000000 | -1.199600000 |
| C               | -4.292100000 | 2.112200000  | 0.351500000  | C               | -4.316200000 | -2.225700000 | 0.018200000  |
| C               | -3.430900000 | 2.224700000  | -0.737300000 | C               | -3.289400000 | -2.396200000 | 0.948700000  |
| Fe              | -0.063500000 | 0.035300000  | 0.265900000  | Fe              | -0.014600000 | -0.071200000 | -0.443200000 |
| O               | 0.326800000  | -0.287900000 | 1.925100000  | O               | 0.250500000  | 0.272600000  | -2.157800000 |
| O               | -0.648600000 | -1.077500000 | 2.924400000  | O               | -0.763300000 | 1.102200000  | -2.940700000 |
| H               | 0.524300000  | 2.160800000  | 2.403600000  | H               | 1.271700000  | -1.881100000 | -2.622800000 |
| H               | 1.780000000  | 4.342500000  | 2.348000000  | H               | 2.963700000  | -3.742800000 | -2.547100000 |
| H               | 2.870100000  | 5.053600000  | 0.202600000  | H               | 3.984900000  | -4.352600000 | -0.337200000 |
| H               | 2.658300000  | 3.570500000  | -1.819100000 | H               | 3.275100000  | -3.096800000 | 1.720700000  |
| H               | 3.611100000  | 0.013500000  | -3.011200000 | H               | 3.441900000  | 0.250800000  | 3.263200000  |
| H               | 4.763300000  | -2.070800000 | -2.198300000 | H               | 4.389600000  | 2.530500000  | 2.788000000  |
| H               | 3.786700000  | -3.314900000 | -0.250000000 | H               | 3.474900000  | 3.849300000  | 0.859700000  |
| H               | 1.708800000  | -2.427200000 | 0.842600000  | H               | 1.644900000  | 2.833400000  | -0.542800000 |
| H               | -1.120300000 | -0.180300000 | -3.378100000 | H               | -1.186600000 | -0.218900000 | 3.205000000  |
| H               | 0.379800000  | -0.984900000 | -2.887900000 | H               | 0.119400000  | 0.898200000  | 2.773700000  |
| H               | -0.612500000 | 2.725900000  | -1.595300000 | H               | -0.177200000 | -2.863400000 | 1.131800000  |
| H               | -1.598800000 | 1.807900000  | -2.747800000 | H               | -1.089800000 | -2.307800000 | 2.555500000  |
| H               | -2.243500000 | -2.487200000 | -3.367600000 | H               | -2.883400000 | 1.616600000  | 3.234800000  |
| H               | -3.311100000 | -4.244300000 | -1.931500000 | H               | -4.311500000 | 3.159700000  | 1.873200000  |
| H               | -2.893600000 | -4.188600000 | 0.552100000  | H               | -3.758700000 | 3.482900000  | -0.563200000 |
| H               | -1.477000000 | -2.357100000 | 1.487300000  | H               | -1.855900000 | 2.195800000  | -1.535400000 |
| H               | -2.248700000 | 0.223800000  | 2.310200000  | H               | -2.478800000 | -0.641200000 | -2.367300000 |
| H               | -4.519500000 | 1.286600000  | 2.346400000  | H               | -4.822500000 | -1.449200000 | -1.943700000 |
| H               | -5.282500000 | 2.566000000  | 0.316800000  | H               | -5.326400000 | -2.563100000 | 0.251200000  |
| H               | -3.722700000 | 2.764000000  | -1.637600000 | H               | -3.472100000 | -2.866200000 | 1.914300000  |
| H               | -0.472400000 | -0.517100000 | 3.724500000  | H               | -0.708600000 | 0.620000000  | -3.807000000 |
| H               | 1.470400000  | 1.485800000  | -2.840100000 | H               | 1.594600000  | -1.431400000 | 2.728300000  |
| O               | 1.473400000  | -2.829800000 | 2.987500000  | O               | 1.121900000  | 3.116300000  | -2.660500000 |
| O               | 2.329500000  | -1.628600000 | 3.228700000  | O               | 2.149500000  | 2.078400000  | -2.978500000 |
| H               | 0.568800000  | -2.422600000 | 3.140500000  | H               | 0.296500000  | 2.634800000  | -2.958800000 |
| H               | 1.865000000  | -0.963800000 | 2.642900000  | H               | 1.725600000  | 1.280200000  | -2.549300000 |

| <sup>6</sup> RC |              |              |              | <sup>2</sup> TS1 |              |              |              |
|-----------------|--------------|--------------|--------------|------------------|--------------|--------------|--------------|
| C               | -1.884800000 | 2.033100000  | -1.924400000 | C                | 2.102500000  | 1.346500000  | 1.924500000  |
| C               | -2.898300000 | 2.984900000  | -1.961100000 | C                | 3.389300000  | 1.825200000  | 2.144100000  |
| C               | -3.605200000 | 3.263200000  | -0.793800000 | C                | 4.356800000  | 1.662800000  | 1.155700000  |
| C               | -3.281900000 | 2.588500000  | 0.385300000  | C                | 4.022000000  | 1.028200000  | -0.042400000 |
| C               | -2.258500000 | 1.657300000  | 0.347700000  | C                | 2.725500000  | 0.574900000  | -0.197100000 |
| N               | -1.581900000 | 1.384200000  | -0.789700000 | N                | 1.797300000  | 0.729200000  | 0.775400000  |
| C               | -1.806200000 | 0.836800000  | 1.540400000  | C                | 2.159600000  | -0.125500000 | -1.408200000 |
| C               | -2.287200000 | -0.581500000 | 1.318000000  | C                | 1.915200000  | -1.564700000 | -1.034300000 |
| C               | -3.321800000 | -1.162200000 | 2.030800000  | C                | 2.617800000  | -2.656000000 | -1.508300000 |
| C               | -3.677600000 | -2.478000000 | 1.729300000  | C                | 2.210800000  | -3.927900000 | -1.102300000 |
| C               | -2.984500000 | -3.160300000 | 0.734100000  | C                | 1.112000000  | -4.058100000 | -0.257600000 |
| C               | -1.956200000 | -2.511100000 | 0.057600000  | C                | 0.450800000  | -2.917900000 | 0.185400000  |
| N               | -1.622300000 | -1.241900000 | 0.342300000  | N                | 0.868900000  | -1.698800000 | -0.184400000 |
| N               | -0.314100000 | 0.805900000  | 1.512700000  | N                | 0.776400000  | 0.463800000  | -1.588700000 |
| C               | 0.295500000  | -0.129100000 | 2.490300000  | C                | -0.062200000 | -0.244600000 | -2.610700000 |
| C               | 0.303700000  | 2.152000000  | 1.562000000  | C                | 0.792000000  | 1.948300000  | -1.785200000 |
| C               | 1.517600000  | 2.204500000  | 0.677900000  | C                | -0.282100000 | 2.572000000  | -0.951900000 |
| C               | 1.502400000  | -0.800000000 | 1.890900000  | C                | -1.440300000 | -0.484100000 | -2.069000000 |
| C               | 2.625400000  | -1.125600000 | 2.640400000  | C                | -2.535600000 | -0.742300000 | -2.881400000 |
| C               | 3.683300000  | -1.789200000 | 2.020600000  | C                | -3.761000000 | -1.042000000 | -2.292400000 |
| C               | 3.587100000  | -2.116100000 | 0.669500000  | C                | -3.863400000 | -1.069400000 | -0.903000000 |
| C               | 2.439200000  | -1.755300000 | -0.023300000 | C                | -2.743000000 | -0.783200000 | -0.137700000 |
| N               | 1.422300000  | -1.110000000 | 0.576900000  | N                | -1.561000000 | -0.504900000 | -0.719400000 |
| N               | 1.445400000  | 1.504100000  | -0.476200000 | N                | -0.678000000 | 1.864200000  | 0.134400000  |
| C               | 2.462300000  | 1.565800000  | -1.354300000 | C                | -1.605500000 | 2.357200000  | 0.974100000  |
| C               | 3.599300000  | 2.326400000  | -1.110300000 | C                | -2.160400000 | 3.612500000  | 0.763300000  |
| C               | 3.689800000  | 3.031700000  | 0.087200000  | C                | -1.767100000 | 4.353700000  | -0.348100000 |
| C               | 2.631500000  | 2.972000000  | 0.992500000  | C                | -0.819600000 | 3.822700000  | -1.219200000 |
| Fe              | -0.049100000 | -0.076000000 | -0.566900000 | Fe               | 0.021900000  | 0.038400000  | 0.272400000  |
| O               | 0.156400000  | -0.693200000 | -2.331300000 | O                | -0.350800000 | -0.394300000 | 1.822000000  |
| O               | 1.462500000  | -0.878200000 | -2.954200000 | O                | -2.080400000 | 0.141600000  | 2.971000000  |
| H               | -1.292900000 | 1.773100000  | -2.801000000 | H                | 1.298700000  | 1.439900000  | 2.651200000  |
| H               | -3.122100000 | 3.499000000  | -2.894700000 | H                | 3.619400000  | 2.322200000  | 3.085400000  |
| H               | -4.400500000 | 4.008900000  | -0.795000000 | H                | 5.368100000  | 2.039400000  | 1.308500000  |
| H               | -3.804500000 | 2.791700000  | 1.319300000  | H                | 4.745100000  | 0.900200000  | -0.846200000 |
| H               | -3.828500000 | -0.600400000 | 2.814400000  | H                | 3.447300000  | -2.510700000 | -2.198600000 |
| H               | -4.483600000 | -2.966000000 | 2.277500000  | H                | 2.737000000  | -4.811000000 | -1.464100000 |
| H               | -3.229200000 | -4.190100000 | 0.476500000  | H                | 0.754000000  | -5.036100000 | 0.060400000  |
| H               | -1.389300000 | -3.001000000 | -0.731100000 | H                | -0.423600000 | -2.967200000 | 0.830500000  |
| H               | 0.549500000  | 0.386500000  | 3.428000000  | H                | -0.086000000 | 0.326700000  | -3.546700000 |
| H               | -0.434800000 | -0.915000000 | 2.734200000  | H                | 0.396600000  | -1.219400000 | -2.831400000 |
| H               | -0.418300000 | 2.886200000  | 1.173500000  | H                | 1.764000000  | 2.338100000  | -1.449700000 |
| H               | 0.544900000  | 2.441700000  | 2.594800000  | H                | 0.685100000  | 2.195900000  | -2.848600000 |
| H               | 2.671100000  | -0.854500000 | 3.694800000  | H                | -2.419000000 | -0.711400000 | -3.964100000 |
| H               | 4.579500000  | -2.040600000 | 2.588500000  | H                | -4.631400000 | -1.247800000 | -2.915100000 |
| H               | 4.393000000  | -2.632700000 | 0.149100000  | H                | -4.804100000 | -1.299000000 | -0.404400000 |
| H               | 2.312200000  | -1.964800000 | -1.082800000 | H                | -2.761600000 | -0.763300000 | 0.947700000  |
| H               | 2.352100000  | 0.966700000  | -2.256500000 | H                | -1.893600000 | 1.708300000  | 1.805100000  |
| H               | 4.402800000  | 2.346500000  | -1.845800000 | H                | -2.905500000 | 3.987100000  | 1.463600000  |
| H               | 4.578800000  | 3.618400000  | 0.319900000  | H                | -2.201800000 | 5.334000000  | -0.543500000 |
| H               | 2.666900000  | 3.512600000  | 1.937800000  | H                | -0.493100000 | 4.367500000  | -2.104300000 |
| H               | 1.200100000  | -0.864400000 | -3.912300000 | H                | -1.422100000 | 0.328400000  | 3.683800000  |
| H               | -2.202500000 | 1.249100000  | 2.481100000  | H                | 2.784200000  | -0.013500000 | -2.303900000 |
| O               | 0.646600000  | -3.768500000 | -1.907700000 | O                | -2.616900000 | -2.290700000 | 3.191600000  |
| O               | -0.472600000 | -3.288800000 | -2.761100000 | O                | -1.209500000 | -2.684100000 | 3.020700000  |
| H               | 1.375300000  | -3.806100000 | -2.577900000 | H                | -2.497100000 | -1.228000000 | 3.166800000  |
| H               | -0.359600000 | -2.295700000 | -2.635900000 | H                | -0.821900000 | -1.861300000 | 2.583100000  |

| <sup>4</sup> TS1 |              |              |              | <sup>6</sup> TS1 |              |              |              |
|------------------|--------------|--------------|--------------|------------------|--------------|--------------|--------------|
| C                | 2.181900000  | 1.397400000  | 1.805100000  | C                | -1.891500000 | 1.969100000  | -1.898600000 |
| C                | 3.469100000  | 1.905900000  | 1.940300000  | C                | -2.977400000 | 2.833700000  | -1.972100000 |
| C                | 4.376500000  | 1.754900000  | 0.894600000  | C                | -3.748100000 | 3.053200000  | -0.832800000 |
| C                | 3.981900000  | 1.100300000  | -0.273900000 | C                | -3.419700000 | 2.408100000  | 0.362300000  |
| C                | 2.689800000  | 0.614600000  | -0.342400000 | C                | -2.326900000 | 1.562200000  | 0.366800000  |
| N                | 1.818100000  | 0.758700000  | 0.684800000  | N                | -1.585800000 | 1.350300000  | -0.749000000 |
| C                | 2.072900000  | -0.124900000 | -1.505100000 | C                | -1.866200000 | 0.739300000  | 1.548100000  |
| C                | 1.882500000  | -1.556800000 | -1.070700000 | C                | -2.289600000 | -0.692700000 | 1.297100000  |
| C                | 2.583400000  | -2.648900000 | -1.545600000 | C                | -3.296300000 | -1.347700000 | 1.983600000  |
| C                | 2.257900000  | -3.909600000 | -1.041300000 | C                | -3.562300000 | -2.676400000 | 1.642000000  |
| C                | 1.243200000  | -4.028000000 | -0.096400000 | C                | -2.818000000 | -3.289400000 | 0.638100000  |
| C                | 0.573700000  | -2.888600000 | 0.337800000  | C                | -1.824600000 | -2.561200000 | -0.012600000 |
| N                | 0.906500000  | -1.679500000 | -0.136800000 | N                | -1.578100000 | -1.286000000 | 0.314300000  |
| N                | 0.670600000  | 0.436500000  | -1.635700000 | N                | -0.354300000 | 0.751300000  | 1.507100000  |
| C                | -0.199600000 | -0.322000000 | -2.591400000 | C                | 0.275300000  | -0.206800000 | 2.479900000  |
| C                | 0.639400000  | 1.913000000  | -1.873500000 | C                | 0.210900000  | 2.133700000  | 1.651700000  |
| C                | -0.398600000 | 2.539000000  | -0.994300000 | C                | 1.493600000  | 2.218100000  | 0.881100000  |
| C                | -1.550500000 | -0.544200000 | -1.979000000 | C                | 1.436600000  | -0.912000000 | 1.846100000  |
| C                | -2.688500000 | -0.806500000 | -2.728600000 | C                | 2.510200000  | -1.404100000 | 2.573700000  |
| C                | -3.886900000 | -1.071300000 | -2.070200000 | C                | 3.505700000  | -2.117000000 | 1.906600000  |
| C                | -3.917900000 | -1.054600000 | -0.677200000 | C                | 3.406900000  | -2.313600000 | 0.529900000  |
| C                | -2.753900000 | -0.769400000 | 0.020500000  | C                | 2.321100000  | -1.778800000 | -0.147200000 |
| N                | -1.596500000 | -0.534200000 | -0.625000000 | N                | 1.359600000  | -1.100500000 | 0.505700000  |
| N                | -0.693300000 | 1.865800000  | 0.144300000  | N                | 1.478000000  | 1.556600000  | -0.297800000 |
| C                | -1.557700000 | 2.384700000  | 1.036500000  | C                | 2.553100000  | 1.574200000  | -1.102500000 |
| C                | -2.156700000 | 3.617800000  | 0.818000000  | C                | 3.701300000  | 2.273700000  | -0.750400000 |
| C                | -1.874800000 | 4.314700000  | -0.354500000 | C                | 3.731300000  | 2.952200000  | 0.466700000  |
| C                | -0.984800000 | 3.765200000  | -1.273800000 | C                | 2.610200000  | 2.926600000  | 1.297900000  |
| Fe               | 0.041400000  | 0.043800000  | 0.271300000  | Fe               | -0.032400000 | 0.064100000  | -0.425400000 |
| O                | -0.462300000 | -0.231400000 | 1.842800000  | O                | 0.307900000  | -0.375200000 | -2.000200000 |
| O                | -1.657300000 | 0.442700000  | 3.661700000  | O                | 1.520300000  | -0.268200000 | -3.791800000 |
| H                | 1.421400000  | 1.484900000  | 2.577500000  | H                | -1.246100000 | 1.753900000  | -2.747600000 |
| H                | 3.746900000  | 2.416900000  | 2.860900000  | H                | -3.208800000 | 3.326300000  | -2.915300000 |
| H                | 5.386700000  | 2.155000000  | 0.980400000  | H                | -4.601800000 | 3.730100000  | -0.868100000 |
| H                | 4.656400000  | 0.979300000  | -1.120000000 | H                | -3.996800000 | 2.563800000  | 1.272700000  |
| H                | 3.352600000  | -2.515100000 | -2.304100000 | H                | -3.846200000 | -0.839700000 | 2.774700000  |
| H                | 2.786200000  | -4.793500000 | -1.397800000 | H                | -4.340300000 | -3.229300000 | 2.168700000  |
| H                | 0.957900000  | -4.997600000 | 0.309500000  | H                | -2.997100000 | -4.326100000 | 0.355200000  |
| H                | -0.223200000 | -2.922800000 | 1.075200000  | H                | -1.217900000 | -2.984300000 | -0.812200000 |
| H                | -0.267400000 | 0.206700000  | -3.550200000 | H                | 0.568700000  | 0.324100000  | 3.394000000  |
| H                | 0.259900000  | -1.302500000 | -2.784400000 | H                | -0.472000000 | -0.964100000 | 2.759000000  |
| H                | 1.619600000  | 2.333500000  | -1.603600000 | H                | -0.504200000 | 2.845600000  | 1.214300000  |
| H                | 0.466200000  | 2.129000000  | -2.934900000 | H                | 0.335500000  | 2.382700000  | 2.713300000  |
| H                | -2.628100000 | -0.801700000 | -3.816400000 | H                | 2.561900000  | -1.231600000 | 3.648000000  |
| H                | -4.791200000 | -1.278800000 | -2.642100000 | H                | 4.359000000  | -2.508800000 | 2.460100000  |
| H                | -4.837300000 | -1.247600000 | -0.126000000 | H                | 4.168600000  | -2.862800000 | -0.021900000 |
| H                | -2.711200000 | -0.724800000 | 1.105000000  | H                | 2.187300000  | -1.873600000 | -1.222600000 |
| H                | -1.749100000 | 1.783600000  | 1.925800000  | H                | 2.468600000  | 0.995900000  | -2.024100000 |
| H                | -2.847300000 | 4.012500000  | 1.562500000  | H                | 4.562200000  | 2.269500000  | -1.417800000 |
| H                | -2.347000000 | 5.276500000  | -0.556400000 | H                | 4.627000000  | 3.491100000  | 0.775700000  |
| H                | -0.738000000 | 4.278100000  | -2.202800000 | H                | 2.604800000  | 3.440700000  | 2.258100000  |
| H                | -0.751500000 | 0.692400000  | 3.981100000  | H                | 0.902100000  | 0.469900000  | -4.030900000 |
| H                | 2.650100000  | -0.028600000 | -2.434400000 | H                | -2.246100000 | 1.126200000  | 2.504100000  |
| O                | -2.319300000 | -2.910900000 | 2.311100000  | O                | 0.801000000  | -3.550900000 | -2.367900000 |
| O                | -1.125700000 | -2.561300000 | 3.124300000  | O                | -0.345100000 | -2.805300000 | -2.946700000 |
| H                | -3.042500000 | -2.677100000 | 2.946900000  | H                | 1.387600000  | -3.620700000 | -3.163700000 |
| H                | -0.940100000 | -1.636100000 | 2.774600000  | H                | -0.094300000 | -1.866300000 | -2.671800000 |



| <sup>2</sup> INT |              |              |              | <sup>4</sup> INT |              |              |              |
|------------------|--------------|--------------|--------------|------------------|--------------|--------------|--------------|
| C                | 1.643100000  | -1.877400000 | -1.915700000 | C                | -1.591300000 | 2.293900000  | -1.277600000 |
| C                | 2.783400000  | -2.625500000 | -2.186400000 | C                | -2.661600000 | 3.179800000  | -1.223400000 |
| C                | 3.855300000  | -2.584800000 | -1.298000000 | C                | -3.589100000 | 3.069600000  | -0.190500000 |
| C                | 3.768300000  | -1.802000000 | -0.144700000 | C                | -3.431200000 | 2.077000000  | 0.779600000  |
| C                | 2.607800000  | -1.081200000 | 0.065000000  | C                | -2.349500000 | 1.224800000  | 0.666800000  |
| N                | 1.578500000  | -1.116800000 | -0.814500000 | N                | -1.459500000 | 1.334000000  | -0.349800000 |
| C                | 2.314500000  | -0.171800000 | 1.234600000  | C                | -2.009600000 | 0.079700000  | 1.592300000  |
| C                | 2.340600000  | 1.243100000  | 0.712100000  | C                | -2.288400000 | -1.194700000 | 0.829000000  |
| C                | 3.298500000  | 2.197600000  | 0.997900000  | C                | -3.318400000 | -2.084300000 | 1.066800000  |
| C                | 3.149000000  | 3.468400000  | 0.440500000  | C                | -3.420500000 | -3.206800000 | 0.241500000  |
| C                | 2.044700000  | 3.738500000  | -0.363200000 | C                | -2.492200000 | -3.401400000 | -0.778300000 |
| C                | 1.115300000  | 2.733900000  | -0.607200000 | C                | -1.476600000 | -2.470200000 | -0.963400000 |
| N                | 1.280600000  | 1.507500000  | -0.091500000 | N                | -1.396900000 | -1.388800000 | -0.173800000 |
| N                | 0.862800000  | -0.433300000 | 1.586400000  | N                | -0.504100000 | 0.128500000  | 1.744400000  |
| C                | 0.296400000  | 0.530200000  | 2.585300000  | C                | 0.072200000  | -1.058600000 | 2.452800000  |
| C                | 0.586500000  | -1.863200000 | 1.937400000  | C                | 0.009200000  | 1.429600000  | 2.281800000  |
| C                | -0.672300000 | -2.309700000 | 1.259200000  | C                | 1.207900000  | 1.862500000  | 1.490500000  |
| C                | -1.045900000 | 1.018000000  | 2.124500000  | C                | 1.282900000  | -1.550700000 | 1.716400000  |
| C                | -1.981900000 | 1.576300000  | 2.984600000  | C                | 2.276100000  | -2.309400000 | 2.319400000  |
| C                | -3.172300000 | 2.073300000  | 2.461200000  | C                | 3.327900000  | -2.789500000 | 1.543900000  |
| C                | -3.400200000 | 1.995800000  | 1.088500000  | C                | 3.360600000  | -2.494900000 | 0.182600000  |
| C                | -2.437700000 | 1.413300000  | 0.278600000  | C                | 2.350400000  | -1.718100000 | -0.364800000 |
| N                | -1.285400000 | 0.943800000  | 0.793000000  | N                | 1.333300000  | -1.264600000 | 0.392000000  |
| N                | -1.006500000 | -1.635900000 | 0.132300000  | N                | 1.283900000  | 1.390400000  | 0.222400000  |
| C                | -2.092700000 | -1.988000000 | -0.580800000 | C                | 2.296500000  | 1.754400000  | -0.586200000 |
| C                | -2.882100000 | -3.060900000 | -0.189700000 | C                | 3.275000000  | 2.635900000  | -0.150300000 |
| C                | -2.552600000 | -3.765600000 | 0.965900000  | C                | 3.213200000  | 3.130200000  | 1.151000000  |
| C                | -1.434900000 | -3.380800000 | 1.702300000  | C                | 2.168500000  | 2.734600000  | 1.982500000  |
| Fe               | 0.050300000  | -0.031000000 | -0.241800000 | Fe               | -0.013800000 | 0.006500000  | -0.234800000 |
| O                | -0.559100000 | 0.262300000  | -1.771800000 | O                | 0.272700000  | -0.071600000 | -1.882600000 |
| O                | -3.386100000 | -0.398500000 | -3.103700000 | O                | -1.715000000 | -0.254300000 | -3.284400000 |
| H                | 0.768700000  | -1.861600000 | -2.562900000 | H                | -0.833000000 | 2.314100000  | -2.057600000 |
| H                | 2.820000000  | -3.233500000 | -3.089200000 | H                | -2.757800000 | 3.947100000  | -1.990300000 |
| H                | 4.754900000  | -3.168100000 | -1.493500000 | H                | -4.431000000 | 3.759200000  | -0.131500000 |
| H                | 4.577100000  | -1.760400000 | 0.583300000  | H                | -4.125900000 | 1.970800000  | 1.610900000  |
| H                | 4.130700000  | 1.954200000  | 1.656600000  | H                | -4.015200000 | -1.907500000 | 1.884300000  |
| H                | 3.883400000  | 4.246300000  | 0.648500000  | H                | -4.219300000 | -3.930300000 | 0.403500000  |
| H                | 1.889500000  | 4.723700000  | -0.800400000 | H                | -2.545400000 | -4.269600000 | -1.433600000 |
| H                | 0.225800000  | 2.899800000  | -1.208700000 | H                | -0.721700000 | -2.553100000 | -1.742400000 |
| H                | 0.240700000  | 0.064900000  | 3.577100000  | H                | 0.301300000  | -0.809200000 | 3.496100000  |
| H                | 0.971400000  | 1.395200000  | 2.663300000  | H                | -0.678200000 | -1.863000000 | 2.460900000  |
| H                | 1.417800000  | -2.481900000 | 1.568900000  | H                | -0.775500000 | 2.191900000  | 2.169600000  |
| H                | 0.536200000  | -1.989700000 | 3.025900000  | H                | 0.234300000  | 1.341500000  | 3.351800000  |
| H                | -1.771400000 | 1.617500000  | 4.052700000  | H                | 2.218100000  | -2.516500000 | 3.387300000  |
| H                | -3.919400000 | 2.513500000  | 3.121700000  | H                | 4.119000000  | -3.383400000 | 2.001300000  |
| H                | -4.319300000 | 2.370800000  | 0.640800000  | H                | 4.167100000  | -2.848600000 | -0.458100000 |
| H                | -2.564300000 | 1.303200000  | -0.795600000 | H                | 2.335100000  | -1.442900000 | -1.416100000 |
| H                | -2.322800000 | -1.381600000 | -1.458100000 | H                | 2.308200000  | 1.305700000  | -1.578800000 |
| H                | -3.754200000 | -3.324000000 | -0.787000000 | H                | 4.081200000  | 2.914900000  | -0.827500000 |
| H                | -3.165700000 | -4.602800000 | 1.299000000  | H                | 3.979200000  | 3.811500000  | 1.521300000  |
| H                | -1.149000000 | -3.901500000 | 2.615300000  | H                | 2.092200000  | 3.093400000  | 3.008100000  |
| H                | -2.841300000 | -0.823600000 | -3.802200000 | H                | -2.166100000 | -0.187500000 | -2.404800000 |
| H                | 2.988200000  | -0.330800000 | 2.086700000  | H                | -2.533200000 | 0.131100000  | 2.555700000  |
| O                | -2.450900000 | 2.251300000  | -3.114300000 | O                | 3.032800000  | 0.049300000  | -3.380100000 |
| O                | -1.103500000 | 2.272800000  | -3.109600000 | O                | 1.940300000  | -0.893900000 | -3.733300000 |
| H                | -3.029600000 | 0.529900000  | -3.064400000 | H                | 2.895700000  | 0.747300000  | -4.070300000 |
| H                | -0.818300000 | 1.375600000  | -2.576300000 | H                | 1.228600000  | -0.580500000 | -3.081300000 |

| <sup>6</sup> INT |              |              | <sup>2</sup> TS2 |    |              |              |              |
|------------------|--------------|--------------|------------------|----|--------------|--------------|--------------|
| C                | -1.867000000 | 1.740900000  | -2.125300000     | C  | 1.707700000  | -1.856200000 | -1.902200000 |
| C                | -2.970900000 | 2.559200000  | -2.333800000     | C  | 2.868200000  | -2.579300000 | -2.155900000 |
| C                | -3.852800000 | 2.792400000  | -1.281400000     | C  | 3.930600000  | -2.506000000 | -1.258300000 |
| C                | -3.617500000 | 2.206100000  | -0.034900000     | C  | 3.815900000  | -1.713600000 | -0.114100000 |
| C                | -2.500000000 | 1.407400000  | 0.107800000      | C  | 2.637100000  | -1.018100000 | 0.077400000  |
| N                | -1.648200000 | 1.184800000  | -0.924600000     | N  | 1.615500000  | -1.087900000 | -0.808700000 |
| C                | -2.113400000 | 0.653700000  | 1.358500000      | C  | 2.308200000  | -0.107400000 | 1.234500000  |
| C                | -2.449100000 | -0.804400000 | 1.131400000      | C  | 2.295800000  | 1.305300000  | 0.705900000  |
| C                | -3.506600000 | -1.470400000 | 1.724200000      | C  | 3.220500000  | 2.289000000  | 1.000700000  |
| C                | -3.688300000 | -2.818900000 | 1.408400000      | C  | 3.027700000  | 3.559500000  | 0.455600000  |
| C                | -2.810400000 | -3.442200000 | 0.525800000      | C  | 1.914500000  | 3.799200000  | -0.344700000 |
| C                | -1.770400000 | -2.702600000 | -0.030700000     | C  | 1.020700000  | 2.765400000  | -0.600000000 |
| N                | -1.606900000 | -1.406900000 | 0.264900000      | N  | 1.228700000  | 1.538700000  | -0.099300000 |
| N                | -0.605800000 | 0.739600000  | 1.440700000      | N  | 0.859700000  | -0.409000000 | 1.576000000  |
| C                | -0.012800000 | -0.148200000 | 2.500700000      | C  | 0.264300000  | 0.547600000  | 2.567500000  |
| C                | -0.127700000 | 2.156500000  | 1.578500000      | C  | 0.624200000  | -1.844200000 | 1.938500000  |
| C                | 1.224100000  | 2.279700000  | 0.945100000      | C  | -0.615600000 | -2.332800000 | 1.255200000  |
| C                | 1.257700000  | -0.765300000 | 2.001900000      | C  | -1.083000000 | 1.005900000  | 2.094600000  |
| C                | 2.310200000  | -1.111600000 | 2.835900000      | C  | -2.029100000 | 1.564400000  | 2.942800000  |
| C                | 3.437000000  | -1.720200000 | 2.285600000      | C  | -3.226700000 | 2.031700000  | 2.408900000  |
| C                | 3.484500000  | -1.966100000 | 0.914400000      | C  | -3.453300000 | 1.917800000  | 1.038600000  |
| C                | 2.408100000  | -1.584800000 | 0.129100000      | C  | -2.479800000 | 1.338000000  | 0.240400000  |
| N                | 1.318300000  | -1.004900000 | 0.666700000      | N  | -1.316500000 | 0.905300000  | 0.763800000  |
| N                | 1.365800000  | 1.595000000  | -0.213600000     | N  | -0.963600000 | -1.674100000 | 0.123900000  |
| C                | 2.532200000  | 1.641300000  | -0.879000000     | C  | -2.040400000 | -2.056600000 | -0.556700000 |
| C                | 3.605700000  | 2.389400000  | -0.410500000     | C  | -2.801400000 | -3.148700000 | -0.194400000 |
| C                | 3.468700000  | 3.090800000  | 0.785200000      | C  | -2.454400000 | -3.840300000 | 0.964200000  |
| C                | 2.257500000  | 3.036900000  | 1.475700000      | C  | -1.349400000 | -3.422300000 | 1.701400000  |
| Fe               | -0.078400000 | 0.004300000  | -0.411600000     | Fe | 0.053800000  | -0.040800000 | -0.248900000 |
| O                | 0.288500000  | -0.568800000 | -1.952000000     | O  | -0.566300000 | 0.179200000  | -1.819200000 |
| O                | 2.408200000  | -0.270100000 | -3.693700000     | O  | -3.445500000 | -0.383900000 | -3.063800000 |
| H                | -1.139700000 | 1.514000000  | -2.902400000     | H  | 0.838800000  | -1.867900000 | -2.556700000 |
| H                | -3.129900000 | 3.004600000  | -3.314500000     | H  | 2.927200000  | -3.194400000 | -3.052400000 |
| H                | -4.722200000 | 3.434000000  | -1.424300000     | H  | 4.844200000  | -3.072500000 | -1.439100000 |
| H                | -4.284400000 | 2.372000000  | 0.809800000      | H  | 4.616900000  | -1.645600000 | 0.620500000  |
| H                | -4.161400000 | -0.953500000 | 2.424000000      | H  | 4.058200000  | 2.069100000  | 1.660600000  |
| H                | -4.505300000 | -3.380000000 | 1.861600000      | H  | 3.733600000  | 4.360600000  | 0.673400000  |
| H                | -2.919300000 | -4.495200000 | 0.269100000      | H  | 1.722800000  | 4.783400000  | -0.769600000 |
| H                | -1.048900000 | -3.147900000 | -0.712900000     | H  | 0.124900000  | 2.910300000  | -1.197800000 |
| H                | 0.144000000  | 0.423500000  | 3.424300000      | H  | 0.211200000  | 0.083900000  | 3.560200000  |
| H                | -0.726000000 | -0.954700000 | 2.723200000      | H  | 0.921200000  | 1.426100000  | 2.647300000  |
| H                | -0.828400000 | 2.809400000  | 1.038200000      | H  | 1.477300000  | -2.440200000 | 1.582900000  |
| H                | -0.130100000 | 2.452200000  | 2.635400000      | H  | 0.568700000  | -1.960100000 | 3.027600000  |
| H                | 2.248100000  | -0.897100000 | 3.902000000      | H  | -1.820000000 | 1.630300000  | 4.009900000  |
| H                | 4.278000000  | -1.990500000 | 2.924300000      | H  | -3.980600000 | 2.474700000  | 3.059300000  |
| H                | 4.351500000  | -2.431600000 | 0.448100000      | H  | -4.380600000 | 2.262800000  | 0.583300000  |
| H                | 2.405100000  | -1.715600000 | -0.950300000     | H  | -2.606900000 | 1.201500000  | -0.829800000 |
| H                | 2.603600000  | 1.043000000  | -1.787000000     | H  | -2.285800000 | -1.455800000 | -1.464400000 |
| H                | 4.538700000  | 2.401800000  | -0.972300000     | H  | -3.665600000 | -3.437300000 | -0.791500000 |
| H                | 4.302400000  | 3.666300000  | 1.187400000      | H  | -3.045300000 | -4.692600000 | 1.299300000  |
| H                | 2.118300000  | 3.565200000  | 2.418100000      | H  | -1.052500000 | -3.930300000 | 2.618100000  |
| H                | 1.545900000  | -0.120100000 | -3.231900000     | H  | -2.945100000 | -0.848200000 | -3.770700000 |
| H                | -2.589700000 | 1.058900000  | 2.261800000      | H  | 2.974900000  | -0.240700000 | 2.096400000  |
| O                | 1.893700000  | -3.044300000 | -2.883900000     | O  | -2.395400000 | 2.229700000  | -3.086900000 |
| O                | 0.607900000  | -2.953200000 | -2.530100000     | O  | -1.070600000 | 2.226500000  | -3.010500000 |
| H                | 2.542600000  | -1.234200000 | -3.516700000     | H  | -3.045200000 | 0.526500000  | -3.059700000 |
| H                | 0.429700000  | -1.895500000 | -2.284900000     | H  | -0.758200000 | 1.168600000  | -2.410800000 |

| <sup>4</sup> TS2 |              |              |              | <sup>6</sup> TS2 |              |              |              |
|------------------|--------------|--------------|--------------|------------------|--------------|--------------|--------------|
| C                | 1.676600000  | -1.881700000 | -1.897800000 | C                | 1.805000000  | -1.820900000 | -2.084700000 |
| C                | 2.826200000  | -2.622000000 | -2.151100000 | C                | 2.884700000  | -2.674400000 | -2.278000000 |
| C                | 3.890100000  | -2.562700000 | -1.254200000 | C                | 3.766100000  | -2.904300000 | -1.224400000 |
| C                | 3.787400000  | -1.766700000 | -0.111300000 | C                | 3.555500000  | -2.279000000 | 0.007700000  |
| C                | 2.618700000  | -1.053800000 | 0.079900000  | C                | 2.459500000  | -1.448300000 | 0.136600000  |
| N                | 1.595600000  | -1.110200000 | -0.805500000 | N                | 1.609300000  | -1.228300000 | -0.897500000 |
| C                | 2.305400000  | -0.135600000 | 1.235700000  | C                | 2.089300000  | -0.663200000 | 1.372800000  |
| C                | 2.312400000  | 1.275600000  | 0.702200000  | C                | 2.450900000  | 0.785700000  | 1.123300000  |
| C                | 3.250700000  | 2.247100000  | 0.995500000  | C                | 3.529300000  | 1.437400000  | 1.694800000  |
| C                | 3.075300000  | 3.519500000  | 0.449100000  | C                | 3.732300000  | 2.779100000  | 1.361900000  |
| C                | 1.964600000  | 3.773600000  | -0.350400000 | C                | 2.851300000  | 3.411300000  | 0.488600000  |
| C                | 1.057300000  | 2.751400000  | -0.604100000 | C                | 1.791800000  | 2.684800000  | -0.047600000 |
| N                | 1.248500000  | 1.522000000  | -0.103200000 | N                | 1.611600000  | 1.394100000  | 0.258600000  |
| N                | 0.854500000  | -0.415200000 | 1.582400000  | N                | 0.578500000  | -0.724900000 | 1.455600000  |
| C                | 0.273200000  | 0.552700000  | 2.570200000  | C                | -0.003200000 | 0.191200000  | 2.498500000  |
| C                | 0.598100000  | -1.844700000 | 1.949100000  | C                | 0.081800000  | -2.131900000 | 1.618000000  |
| C                | -0.649300000 | -2.317700000 | 1.267900000  | C                | -1.266500000 | -2.255800000 | 0.976600000  |
| C                | -1.067000000 | 1.031400000  | 2.095600000  | C                | -1.251700000 | 0.837900000  | 1.981000000  |
| C                | -2.002300000 | 1.610300000  | 2.942200000  | C                | -2.296100000 | 1.232100000  | 2.803700000  |
| C                | -3.191700000 | 2.097300000  | 2.407400000  | C                | -3.399700000 | 1.868300000  | 2.237500000  |
| C                | -3.421000000 | 1.983200000  | 1.037500000  | C                | -3.433500000 | 2.092800000  | 0.862300000  |
| C                | -2.458500000 | 1.383000000  | 0.241200000  | C                | -2.367800000 | 1.661900000  | 0.087900000  |
| N                | -1.303600000 | 0.929800000  | 0.765500000  | N                | -1.301000000 | 1.054700000  | 0.641000000  |
| N                | -0.988800000 | -1.658700000 | 0.134200000  | N                | -1.403100000 | -1.575400000 | -0.184900000 |
| C                | -2.069600000 | -2.031700000 | -0.576500000 | C                | -2.563700000 | -1.631600000 | -0.859800000 |
| C                | -2.845400000 | -3.111500000 | -0.178400000 | C                | -3.634100000 | -2.390400000 | -0.401500000 |
| C                | -2.508400000 | -3.802000000 | 0.983900000  | C                | -3.500800000 | -3.091200000 | 0.795200000  |
| C                | -1.397800000 | -3.395400000 | 1.719000000  | C                | -2.297700000 | -3.022500000 | 1.498500000  |
| Fe               | 0.049500000  | -0.040400000 | -0.247700000 | Fe               | 0.066500000  | -0.009800000 | -0.405300000 |
| O                | -0.569300000 | 0.183600000  | -1.805200000 | O                | -0.279000000 | 0.540900000  | -1.973700000 |
| O                | -3.453200000 | -0.378700000 | -3.064400000 | O                | -2.408600000 | 0.238000000  | -3.687200000 |
| H                | 0.806900000  | -1.881600000 | -2.551400000 | H                | 1.078700000  | -1.593700000 | -2.863000000 |
| H                | 2.875800000  | -3.239300000 | -3.046700000 | H                | 3.024200000  | -3.150700000 | -3.247400000 |
| H                | 4.795300000  | -3.142500000 | -1.434600000 | H                | 4.616300000  | -3.573800000 | -1.355200000 |
| H                | 4.589800000  | -1.708800000 | 0.622600000  | H                | 4.222400000  | -2.442400000 | 0.852900000  |
| H                | 4.085400000  | 2.016600000  | 1.655600000  | H                | 4.185000000  | 0.915700000  | 2.390700000  |
| H                | 3.792300000  | 4.311100000  | 0.665700000  | H                | 4.568400000  | 3.328100000  | 1.795300000  |
| H                | 1.785700000  | 4.760000000  | -0.775600000 | H                | 2.973400000  | 4.460500000  | 0.222300000  |
| H                | 0.162600000  | 2.908500000  | -1.199900000 | H                | 1.068600000  | 3.135800000  | -0.724500000 |
| H                | 0.211500000  | 0.093300000  | 3.564400000  | H                | -0.187000000 | -0.366500000 | 3.425500000  |
| H                | 0.943200000  | 1.421500000  | 2.648900000  | H                | 0.729300000  | 0.979700000  | 2.722600000  |
| H                | 1.441800000  | -2.454900000 | 1.595200000  | H                | 0.778400000  | -2.804600000 | 1.097200000  |
| H                | 0.541000000  | -1.957600000 | 3.038600000  | H                | 0.073500000  | -2.407100000 | 2.680700000  |
| H                | -1.791400000 | 1.676800000  | 4.008900000  | H                | -2.245300000 | 1.035000000  | 3.873700000  |
| H                | -3.937000000 | 2.556200000  | 3.056600000  | H                | -4.234000000 | 2.176500000  | 2.867500000  |
| H                | -4.342100000 | 2.343800000  | 0.581500000  | H                | -4.281600000 | 2.581300000  | 0.385000000  |
| H                | -2.586700000 | 1.245700000  | -0.829100000 | H                | -2.353700000 | 1.777000000  | -0.993800000 |
| H                | -2.306700000 | -1.432500000 | -1.456400000 | H                | -2.631400000 | -1.038100000 | -1.771200000 |
| H                | -3.713000000 | -3.391400000 | -0.774700000 | H                | -4.561600000 | -2.413200000 | -0.972400000 |
| H                | -3.111000000 | -4.644500000 | 1.323000000  | H                | -4.331600000 | -3.677900000 | 1.187800000  |
| H                | -1.107600000 | -3.903300000 | 2.637900000  | H                | -2.162400000 | -3.549100000 | 2.442500000  |
| H                | -2.971000000 | -0.855100000 | -3.776000000 | H                | -1.565500000 | 0.178600000  | -3.168700000 |
| H                | 2.974200000  | -0.275100000 | 2.095000000  | H                | 2.557600000  | -1.061700000 | 2.283300000  |
| O                | -2.346000000 | 2.224100000  | -3.137400000 | O                | -1.712900000 | 3.095800000  | -2.863400000 |
| O                | -1.016400000 | 2.218200000  | -3.057000000 | O                | -0.426900000 | 2.890400000  | -2.617800000 |
| H                | -3.025800000 | 0.517700000  | -3.059500000 | H                | -2.623600000 | 1.195600000  | -3.600400000 |
| H                | -0.747700000 | 1.248100000  | -2.474900000 | H                | -0.317900000 | 1.787800000  | -2.307700000 |

| <b><sup>2</sup>P</b> |              |              |              | <b><sup>4</sup>P</b> |              |              |              |
|----------------------|--------------|--------------|--------------|----------------------|--------------|--------------|--------------|
| C                    | -2.423800000 | 0.982900000  | -1.929000000 | C                    | 1.990600000  | 1.383100000  | 2.046200000  |
| C                    | -3.778800000 | 1.228900000  | -2.120200000 | C                    | 3.223200000  | 1.964900000  | 2.319700000  |
| C                    | -4.686200000 | 0.872900000  | -1.124600000 | C                    | 4.209200000  | 1.974600000  | 1.334900000  |
| C                    | -4.221200000 | 0.280000000  | 0.051100000  | C                    | 3.942700000  | 1.406100000  | 0.087600000  |
| C                    | -2.862300000 | 0.057000000  | 0.174400000  | C                    | 2.699400000  | 0.837000000  | -0.116000000 |
| N                    | -1.986100000 | 0.391200000  | -0.806700000 | N                    | 1.750100000  | 0.816200000  | 0.853600000  |
| C                    | -2.160100000 | -0.567000000 | 1.356400000  | C                    | 2.215200000  | 0.167100000  | -1.379700000 |
| C                    | -1.670900000 | -1.919200000 | 0.898400000  | C                    | 2.112500000  | -1.306200000 | -1.067900000 |
| C                    | -2.155500000 | -3.147900000 | 1.307100000  | C                    | 2.929200000  | -2.308100000 | -1.558700000 |
| C                    | -1.572900000 | -4.297400000 | 0.769500000  | C                    | 2.677200000  | -3.620300000 | -1.152900000 |
| C                    | -0.528400000 | -4.173400000 | -0.144400000 | C                    | 1.613200000  | -3.880000000 | -0.291600000 |
| C                    | -0.086200000 | -2.906700000 | -0.507300000 | C                    | 0.826700000  | -2.826000000 | 0.157800000  |
| N                    | -0.661400000 | -1.804400000 | -0.001900000 | N                    | 1.091800000  | -1.563200000 | -0.211500000 |
| N                    | -0.897500000 | 0.261600000  | 1.544300000  | N                    | 0.775300000  | 0.633600000  | -1.546300000 |
| C                    | 0.067100000  | -0.322900000 | 2.533800000  | C                    | 0.024600000  | -0.090300000 | -2.624400000 |
| C                    | -1.163400000 | 1.715400000  | 1.796600000  | C                    | 0.633800000  | 2.122400000  | -1.652800000 |
| C                    | -0.211200000 | 2.545800000  | 0.988000000  | C                    | -0.513200000 | 2.581100000  | -0.801200000 |
| C                    | 1.462500000  | -0.225300000 | 1.990700000  | C                    | -1.352800000 | -0.429400000 | -2.134000000 |
| C                    | 2.594100000  | -0.228500000 | 2.794300000  | C                    | -2.427800000 | -0.657000000 | -2.981600000 |
| C                    | 3.850700000  | -0.206100000 | 2.192100000  | C                    | -3.651400000 | -1.036700000 | -2.433500000 |
| C                    | 3.938500000  | -0.172700000 | 0.802100000  | C                    | -3.765300000 | -1.173200000 | -1.051700000 |
| C                    | 2.770300000  | -0.155100000 | 0.053000000  | C                    | -2.657600000 | -0.916500000 | -0.255200000 |
| N                    | 1.559900000  | -0.187800000 | 0.638800000  | N                    | -1.477300000 | -0.556600000 | -0.789800000 |
| N                    | 0.253400000  | 1.963600000  | -0.145700000 | N                    | -0.820800000 | 1.779900000  | 0.249400000  |
| C                    | 1.056900000  | 2.655200000  | -0.974300000 | C                    | -1.792100000 | 2.141800000  | 1.107400000  |
| C                    | 1.426400000  | 3.964900000  | -0.697100000 | C                    | -2.492800000 | 3.330200000  | 0.946100000  |
| C                    | 0.968200000  | 4.567200000  | 0.472100000  | C                    | -2.192700000 | 4.155200000  | -0.135200000 |
| C                    | 0.137700000  | 3.845200000  | 1.327000000  | C                    | -1.188500000 | 3.772700000  | -1.022500000 |
| Fe                   | -0.141400000 | 0.053300000  | -0.286100000 | Fe                   | 0.079800000  | 0.043900000  | 0.223600000  |
| O                    | 0.527300000  | -0.179500000 | -1.964700000 | O                    | -0.517300000 | -0.527200000 | 1.846100000  |
| O                    | 2.592200000  | 0.794100000  | -3.398700000 | O                    | -2.787800000 | -0.308700000 | 3.286800000  |
| H                    | -1.662400000 | 1.251500000  | -2.659000000 | H                    | 1.172500000  | 1.357800000  | 2.763900000  |
| H                    | -4.110500000 | 1.702500000  | -3.043100000 | H                    | 3.398200000  | 2.409700000  | 3.298300000  |
| H                    | -5.750700000 | 1.067900000  | -1.253800000 | H                    | 5.177400000  | 2.435400000  | 1.529000000  |
| H                    | -4.895600000 | 0.008600000  | 0.861800000  | H                    | 4.678600000  | 1.414500000  | -0.715300000 |
| H                    | -2.960300000 | -3.202000000 | 2.038800000  | H                    | 3.733900000  | -2.067100000 | -2.251500000 |
| H                    | -1.926200000 | -5.282600000 | 1.073200000  | H                    | 3.300000000  | -4.435100000 | -1.521200000 |
| H                    | -0.048700000 | -5.050900000 | -0.576400000 | H                    | 1.382900000  | -4.894300000 | 0.032200000  |
| H                    | 0.727600000  | -2.743100000 | -1.208000000 | H                    | -0.027500000 | -2.963500000 | 0.815000000  |
| H                    | -0.033100000 | 0.172000000  | 3.507800000  | H                    | 0.001200000  | 0.505500000  | -3.545000000 |
| H                    | -0.176600000 | -1.386300000 | 2.673200000  | H                    | 0.552800000  | -1.029100000 | -2.847300000 |
| H                    | -2.187300000 | 1.944300000  | 1.465800000  | H                    | 1.555000000  | 2.588100000  | -1.272200000 |
| H                    | -1.102000000 | 1.938800000  | 2.868800000  | H                    | 0.516300000  | 2.423900000  | -2.701100000 |
| H                    | 2.485500000  | -0.247900000 | 3.878100000  | H                    | -2.301900000 | -0.535500000 | -4.056900000 |
| H                    | 4.752400000  | -0.205400000 | 2.804700000  | H                    | -4.509900000 | -1.216000000 | -3.080900000 |
| H                    | 4.901000000  | -0.146100000 | 0.292500000  | H                    | -4.706000000 | -1.461600000 | -0.584300000 |
| H                    | 2.776900000  | -0.111100000 | -1.031600000 | H                    | -2.691400000 | -0.986100000 | 0.828100000  |
| H                    | 1.410400000  | 2.131600000  | -1.860100000 | H                    | -2.006000000 | 1.450700000  | 1.920400000  |
| H                    | 2.081400000  | 4.492200000  | -1.389600000 | H                    | -3.275700000 | 3.588800000  | 1.658500000  |
| H                    | 1.259000000  | 5.587600000  | 0.721900000  | H                    | -2.739400000 | 5.085000000  | -0.293200000 |
| H                    | -0.238600000 | 4.279800000  | 2.252600000  | H                    | -0.927300000 | 4.388400000  | -1.882500000 |
| H                    | 2.252400000  | 1.039900000  | -4.286400000 | H                    | -2.532900000 | -0.051600000 | 4.199200000  |
| H                    | -2.780100000 | -0.609400000 | 2.261500000  | H                    | 2.838400000  | 0.386200000  | -2.256900000 |
| O                    | 3.264300000  | -2.759400000 | -1.469100000 | O                    | -2.172400000 | -3.227700000 | 2.133100000  |
| O                    | 2.785200000  | -2.278800000 | -2.501400000 | O                    | -1.311400000 | -3.198000000 | 3.015600000  |
| H                    | 1.802300000  | 0.384000000  | -2.944800000 | H                    | -1.913700000 | -0.449700000 | 2.826300000  |
| H                    | -0.067300000 | -0.751300000 | -2.503700000 | H                    | 0.207800000  | -0.961900000 | 2.351900000  |

| ${}^6\text{P}$ |              |              |              | ${}^2\text{RC}_{\text{homo}}$ |              |              |              |
|----------------|--------------|--------------|--------------|-------------------------------|--------------|--------------|--------------|
| C              | 2.143200000  | -1.217900000 | -2.025000000 | C                             | 0.127700000  | -2.925600000 | -0.243000000 |
| C              | 3.456200000  | -1.572200000 | -2.311600000 | C                             | 0.598100000  | -4.134900000 | 0.255100000  |
| C              | 4.464200000  | -1.232000000 | -1.413100000 | C                             | 1.577300000  | -4.133600000 | 1.246400000  |
| C              | 4.138700000  | -0.549300000 | -0.239900000 | C                             | 2.062600000  | -2.918500000 | 1.735500000  |
| C              | 2.812900000  | -0.224300000 | -0.012000000 | C                             | 1.560200000  | -1.750800000 | 1.193400000  |
| N              | 1.843000000  | -0.549400000 | -0.900700000 | N                             | 0.625800000  | -1.761300000 | 0.207700000  |
| C              | 2.293400000  | 0.511800000  | 1.207300000  | C                             | 1.921800000  | -0.343000000 | 1.602100000  |
| C              | 1.854800000  | 1.881500000  | 0.735700000  | C                             | 2.703700000  | 0.270600000  | 0.468200000  |
| C              | 2.486400000  | 3.072400000  | 1.049600000  | C                             | 4.041600000  | 0.618200000  | 0.487900000  |
| C              | 1.945100000  | 4.259300000  | 0.552900000  | C                             | 4.581700000  | 1.217900000  | -0.651600000 |
| C              | 0.788700000  | 4.214400000  | -0.222100000 | C                             | 3.764900000  | 1.458600000  | -1.754500000 |
| C              | 0.206800000  | 2.982000000  | -0.498000000 | C                             | 2.426400000  | 1.087800000  | -1.707200000 |
| N              | 0.747300000  | 1.844900000  | -0.037500000 | N                             | 1.919200000  | 0.486100000  | -0.617900000 |
| N              | 1.059000000  | -0.205600000 | 1.635500000  | N                             | 0.597400000  | 0.410900000  | 1.613500000  |
| C              | 0.195600000  | 0.494000000  | 2.608100000  | C                             | 0.741900000  | 1.893500000  | 1.792500000  |
| C              | 1.231200000  | -1.643700000 | 1.906700000  | C                             | -0.415900000 | -0.181900000 | 2.543900000  |
| C              | 0.182100000  | -2.461500000 | 1.196300000  | C                             | -1.754100000 | -0.196400000 | 1.869600000  |
| C              | -1.243700000 | 0.513200000  | 2.151600000  | C                             | -0.128400000 | 2.612300000  | 0.802900000  |
| C              | -2.294200000 | 0.698600000  | 3.043700000  | C                             | -0.553400000 | 3.921900000  | 0.977100000  |
| C              | -3.597700000 | 0.778700000  | 2.563400000  | C                             | -1.289500000 | 4.534600000  | -0.034700000 |
| C              | -3.827700000 | 0.659200000  | 1.193500000  | C                             | -1.580100000 | 3.819800000  | -1.194800000 |
| C              | -2.747000000 | 0.458000000  | 0.350500000  | C                             | -1.142200000 | 2.507700000  | -1.304700000 |
| N              | -1.487100000 | 0.398200000  | 0.824600000  | N                             | -0.433000000 | 1.921700000  | -0.322900000 |
| N              | -0.374000000 | -1.933000000 | 0.083500000  | N                             | -1.727000000 | -0.235200000 | 0.513300000  |
| C              | -1.271900000 | -2.640300000 | -0.630700000 | C                             | -2.884500000 | -0.281600000 | -0.171000000 |
| C              | -1.640800000 | -3.924400000 | -0.256900000 | C                             | -4.113300000 | -0.316300000 | 0.472900000  |
| C              | -1.082400000 | -4.480800000 | 0.892400000  | C                             | -4.149900000 | -0.283100000 | 1.864700000  |
| C              | -0.163400000 | -3.737600000 | 1.626400000  | C                             | -2.951200000 | -0.216000000 | 2.571100000  |
| Fe             | 0.013700000  | -0.018300000 | -0.373800000 | Fe                            | 0.053300000  | 0.033900000  | -0.271600000 |
| O              | -0.729500000 | 0.292400000  | -2.068000000 | O                             | -0.424300000 | -0.301400000 | -1.946100000 |
| O              | -2.371300000 | -1.277300000 | -3.476400000 | O                             | 0.550200000  | -1.052000000 | -2.826400000 |
| H              | 1.308000000  | -1.453500000 | -2.682000000 | H                             | -0.653600000 | -2.852500000 | -0.999700000 |
| H              | 3.675000000  | -2.113200000 | -3.231200000 | H                             | 0.187400000  | -5.066600000 | -0.131800000 |
| H              | 5.499400000  | -1.506200000 | -1.616000000 | H                             | 1.949800000  | -5.073200000 | 1.654200000  |
| H              | 4.896700000  | -0.285200000 | 0.496200000  | H                             | 2.802600000  | -2.876500000 | 2.533700000  |
| H              | 3.372800000  | 3.068800000  | 1.682400000  | H                             | 4.639300000  | 0.440800000  | 1.380500000  |
| H              | 2.416500000  | 5.214100000  | 0.785000000  | H                             | 5.631200000  | 1.511800000  | -0.668700000 |
| H              | 0.330900000  | 5.122800000  | -0.611200000 | H                             | 4.153900000  | 1.939000000  | -2.651400000 |
| H              | -0.701200000 | 2.879400000  | -1.087700000 | H                             | 1.735300000  | 1.253300000  | -2.530700000 |
| H              | 0.273600000  | 0.038900000  | 3.605900000  | H                             | 0.511500000  | 2.179800000  | 2.826100000  |
| H              | 0.529200000  | 1.538200000  | 2.707900000  | H                             | 1.788400000  | 2.170200000  | 1.597100000  |
| H              | 2.214800000  | -1.967200000 | 1.531600000  | H                             | -0.124300000 | -1.218800000 | 2.766600000  |
| H              | 1.217600000  | -1.850700000 | 2.986700000  | H                             | -0.436800000 | 0.367400000  | 3.493500000  |
| H              | -2.080400000 | 0.780100000  | 4.109200000  | H                             | -0.307300000 | 4.450300000  | 1.897500000  |
| H              | -4.428700000 | 0.923500000  | 3.253500000  | H                             | -1.636700000 | 5.560800000  | 0.085100000  |
| H              | -4.832300000 | 0.708200000  | 0.775500000  | H                             | -2.152800000 | 4.263100000  | -2.008000000 |
| H              | -2.854600000 | 0.338200000  | -0.724400000 | H                             | -1.349700000 | 1.891500000  | -2.177400000 |
| H              | -1.694500000 | -2.159600000 | -1.513800000 | H                             | -2.812800000 | -0.287000000 | -1.254700000 |
| H              | -2.367400000 | -4.468200000 | -0.859400000 | H                             | -5.025500000 | -0.355300000 | -0.121200000 |
| H              | -1.365800000 | -5.481400000 | 1.218900000  | H                             | -5.101300000 | -0.296800000 | 2.396400000  |
| H              | 0.291700000  | -4.137600000 | 2.532500000  | H                             | -2.936200000 | -0.175500000 | 3.659600000  |
| H              | -1.781000000 | -0.621300000 | -2.994600000 | H                             | 1.214100000  | -1.394700000 | -2.174400000 |
| H              | 3.057300000  | 0.580000000  | 1.996200000  | H                             | 2.443400000  | -0.292800000 | 2.566800000  |
| O              | -3.581200000 | 1.618300000  | -2.793500000 | O                             | -2.546100000 | -2.739100000 | -2.314300000 |
| O              | -2.894100000 | 2.493700000  | -2.262800000 | O                             | -2.525100000 | -1.546800000 | -3.204800000 |
| H              | -3.273000000 | -0.903500000 | -3.382900000 | H                             | -2.184200000 | -3.420700000 | -2.936000000 |
| H              | -0.333300000 | 0.960000000  | -2.670300000 | H                             | -1.723800000 | -1.079000000 | -2.826200000 |

| $^4\text{RC}_{\text{homo}}$ |              |              |              | $^6\text{RC}_{\text{homo}}$ |              |              |              |
|-----------------------------|--------------|--------------|--------------|-----------------------------|--------------|--------------|--------------|
| C                           | 1.594500000  | 2.316000000  | 1.320700000  | C                           | 1.929400000  | -2.286400000 | -1.339500000 |
| C                           | 2.681200000  | 3.183200000  | 1.292700000  | C                           | 3.008400000  | -3.150400000 | -1.181400000 |
| C                           | 3.655700000  | 3.019900000  | 0.311600000  | C                           | 3.807800000  | -3.034900000 | -0.046700000 |
| C                           | 3.521300000  | 1.996700000  | -0.629300000 | C                           | 3.511300000  | -2.065400000 | 0.915200000  |
| C                           | 2.418700000  | 1.165900000  | -0.542200000 | C                           | 2.421400000  | -1.244100000 | 0.690300000  |
| N                           | 1.484200000  | 1.322600000  | 0.424600000  | N                           | 1.658100000  | -1.350600000 | -0.419200000 |
| C                           | 2.120800000  | 0.010000000  | -1.476100000 | C                           | 1.960800000  | -0.132300000 | 1.609200000  |
| C                           | 2.317900000  | -1.259000000 | -0.671000000 | C                           | 2.315200000  | 1.179000000  | 0.944900000  |
| C                           | 3.348100000  | -2.164200000 | -0.851300000 | C                           | 3.354500000  | 2.010200000  | 1.317600000  |
| C                           | 3.399200000  | -3.285500000 | -0.020500000 | C                           | 3.568600000  | 3.171100000  | 0.569600000  |
| C                           | 2.417000000  | -3.467100000 | 0.949800000  | C                           | 2.742900000  | 3.458600000  | -0.514400000 |
| C                           | 1.404600000  | -2.522600000 | 1.074900000  | C                           | 1.718500000  | 2.577000000  | -0.838100000 |
| N                           | 1.373000000  | -1.438700000 | 0.283100000  | N                           | 1.522100000  | 1.462200000  | -0.117700000 |
| N                           | 0.665400000  | 0.088900000  | -1.791200000 | N                           | 0.449000000  | -0.192600000 | 1.626900000  |
| C                           | 0.089600000  | -1.091300000 | -2.468500000 | C                           | -0.161400000 | 0.931600000  | 2.412800000  |
| C                           | 0.189600000  | 1.383900000  | -2.322800000 | C                           | -0.084600000 | -1.526200000 | 2.067200000  |
| C                           | -1.023400000 | 1.874600000  | -1.569800000 | C                           | -1.299300000 | -1.880000000 | 1.264700000  |
| C                           | -1.168700000 | -1.561700000 | -1.779800000 | C                           | -1.461500000 | 1.337700000  | 1.786000000  |
| C                           | -2.120200000 | -2.328400000 | -2.442300000 | C                           | -2.571300000 | 1.737800000  | 2.514900000  |
| C                           | -3.227800000 | -2.799600000 | -1.744300000 | C                           | -3.712000000 | 2.150400000  | 1.825600000  |
| C                           | -3.361900000 | -2.489700000 | -0.392200000 | C                           | -3.706000000 | 2.155600000  | 0.432200000  |
| C                           | -2.391400000 | -1.708800000 | 0.216200000  | C                           | -2.565400000 | 1.728700000  | -0.236200000 |
| N                           | -1.318600000 | -1.262300000 | -0.467600000 | N                           | -1.469800000 | 1.328500000  | 0.431900000  |
| N                           | -1.213100000 | 1.414600000  | -0.310300000 | N                           | -1.316500000 | -1.419700000 | -0.011500000 |
| C                           | -2.251900000 | 1.848500000  | 0.431200000  | C                           | -2.336600000 | -1.722900000 | -0.834800000 |
| C                           | -3.141500000 | 2.791500000  | -0.060900000 | C                           | -3.387300000 | -2.522800000 | -0.409500000 |
| C                           | -2.962500000 | 3.276900000  | -1.355100000 | C                           | -3.386200000 | -2.997100000 | 0.901300000  |
| C                           | -1.896200000 | 2.807900000  | -2.116600000 | C                           | -2.330100000 | -2.669600000 | 1.750900000  |
| Fe                          | -0.024800000 | -0.007400000 | 0.329300000  | Fe                          | 0.028200000  | 0.064000000  | -0.390000000 |
| O                           | -0.224500000 | -0.072900000 | 2.214900000  | O                           | -0.215800000 | 0.254300000  | -2.028000000 |
| O                           | 0.857700000  | -0.135800000 | 3.204400000  | O                           | 2.073200000  | 0.417300000  | -3.127500000 |
| H                           | 0.798200000  | 2.387600000  | 2.059600000  | H                           | 1.268200000  | -2.318100000 | -2.204200000 |
| H                           | 2.751100000  | 3.978100000  | 2.034000000  | H                           | 3.212500000  | -3.902400000 | -1.942300000 |
| H                           | 4.512600000  | 3.692100000  | 0.268100000  | H                           | 4.657000000  | -3.702700000 | 0.098100000  |
| H                           | 4.251100000  | 1.851900000  | -1.424400000 | H                           | 4.106500000  | -1.958400000 | 1.820900000  |
| H                           | 4.086800000  | -1.999000000 | -1.634100000 | H                           | 3.976100000  | 1.761100000  | 2.176100000  |
| H                           | 4.198000000  | -4.017200000 | -0.140500000 | H                           | 4.376900000  | 3.850200000  | 0.840200000  |
| H                           | 2.423700000  | -4.335000000 | 1.607600000  | H                           | 2.885600000  | 4.358200000  | -1.111400000 |
| H                           | 0.605900000  | -2.604800000 | 1.810300000  | H                           | 1.043100000  | 2.732500000  | -1.677100000 |
| H                           | -0.108800000 | -0.880100000 | -3.529000000 | H                           | -0.275000000 | 0.639700000  | 3.464500000  |
| H                           | 0.817000000  | -1.916900000 | -2.437300000 | H                           | 0.523000000  | 1.791600000  | 2.372300000  |
| H                           | 0.984300000  | 2.136700000  | -2.209700000 | H                           | 0.684100000  | -2.290000000 | 1.880700000  |
| H                           | -0.030200000 | 1.311300000  | -3.397500000 | H                           | -0.289500000 | -1.515900000 | 3.145300000  |
| H                           | -1.984100000 | -2.549900000 | -3.500600000 | H                           | -2.543300000 | 1.721100000  | 3.603700000  |
| H                           | -3.983300000 | -3.398000000 | -2.253300000 | H                           | -4.601300000 | 2.458300000  | 2.375700000  |
| H                           | -4.212900000 | -2.836000000 | 0.192300000  | H                           | -4.578400000 | 2.472000000  | -0.138100000 |
| H                           | -2.455900000 | -1.433100000 | 1.268100000  | H                           | -2.513400000 | 1.687500000  | -1.323400000 |
| H                           | -2.361100000 | 1.412100000  | 1.424700000  | H                           | -2.301300000 | -1.279900000 | -1.829800000 |
| H                           | -3.968300000 | 3.124500000  | 0.564800000  | H                           | -4.201200000 | -2.751900000 | -1.096000000 |
| H                           | -3.654600000 | 4.008100000  | -1.772900000 | H                           | -4.209000000 | -3.611800000 | 1.266600000  |
| H                           | -1.732000000 | 3.159600000  | -3.134800000 | H                           | -2.305000000 | -3.018300000 | 2.782400000  |
| H                           | 1.661800000  | -0.196800000 | 2.626900000  | H                           | 2.455000000  | 0.245800000  | -2.228100000 |
| H                           | 2.763400000  | 0.030800000  | -2.368600000 | H                           | 2.382200000  | -0.220800000 | 2.619900000  |
| O                           | -3.282700000 | 0.205900000  | 3.106800000  | O                           | -3.100400000 | 0.228200000  | -3.386800000 |
| O                           | -2.381500000 | -0.900600000 | 3.527500000  | O                           | -2.063200000 | 1.267700000  | -3.603800000 |
| H                           | -3.220300000 | 0.798900000  | 3.898700000  | H                           | -2.977400000 | -0.318100000 | -4.204900000 |
| H                           | -1.517400000 | -0.584600000 | 3.100100000  | H                           | -1.312100000 | 0.885600000  | -3.037200000 |

| $2^2\text{TS}_{\text{homo}}$ |              |              |              | $4^4\text{TS}_{\text{homo}}$ |              |              |              |
|------------------------------|--------------|--------------|--------------|------------------------------|--------------|--------------|--------------|
| C                            | -1.760000000 | 2.242800000  | 0.069400000  | C                            | 1.588300000  | -2.344900000 | -1.253900000 |
| C                            | -2.797100000 | 2.903400000  | 0.719400000  | C                            | 2.671000000  | -3.217200000 | -1.210100000 |
| C                            | -3.430000000 | 2.292200000  | 1.798000000  | C                            | 3.643500000  | -3.045400000 | -0.228100000 |
| C                            | -3.006400000 | 1.030500000  | 2.223900000  | C                            | 3.514200000  | -2.007000000 | 0.696600000  |
| C                            | -1.972300000 | 0.425800000  | 1.535600000  | C                            | 2.415100000  | -1.173800000 | 0.593700000  |
| N                            | -1.379200000 | 1.021400000  | 0.471500000  | N                            | 1.480900000  | -1.342300000 | -0.370100000 |
| C                            | -1.371700000 | -0.928300000 | 1.830100000  | C                            | 2.118900000  | 0.008100000  | 1.492700000  |
| C                            | -1.810000000 | -1.851900000 | 0.718000000  | C                            | 2.342900000  | 1.252800000  | 0.659700000  |
| C                            | -2.715200000 | -2.891100000 | 0.819600000  | C                            | 3.390600000  | 2.143000000  | 0.809900000  |
| C                            | -3.000800000 | -3.629500000 | -0.330900000 | C                            | 3.462300000  | 3.232100000  | -0.061400000 |
| C                            | -2.366500000 | -3.313900000 | -1.530000000 | C                            | 2.486600000  | 3.394500000  | -1.041600000 |
| C                            | -1.459100000 | -2.261800000 | -1.564800000 | C                            | 1.456400000  | 2.465200000  | -1.134900000 |
| N                            | -1.210000000 | -1.544600000 | -0.458200000 | N                            | 1.402000000  | 1.417400000  | -0.299900000 |
| N                            | 0.122300000  | -0.750000000 | 1.635100000  | N                            | 0.648000000  | -0.044300000 | 1.766600000  |
| C                            | 0.892300000  | -2.034400000 | 1.670200000  | C                            | 0.087700000  | 1.162300000  | 2.425700000  |
| C                            | 0.723600000  | 0.310400000  | 2.507000000  | C                            | 0.157600000  | -1.321600000 | 2.344400000  |
| C                            | 1.619500000  | 1.195000000  | 1.690800000  | C                            | -1.065100000 | -1.806400000 | 1.611400000  |
| C                            | 1.880200000  | -2.058700000 | 0.542400000  | C                            | -1.165700000 | 1.623400000  | 1.730000000  |
| C                            | 3.018500000  | -2.852600000 | 0.544300000  | C                            | -2.114600000 | 2.411100000  | 2.369200000  |
| C                            | 3.837400000  | -2.864400000 | -0.582100000 | C                            | -3.213400000 | 2.874700000  | 1.652200000  |
| C                            | 3.497400000  | -2.080400000 | -1.682600000 | C                            | -3.339600000 | 2.534700000  | 0.306800000  |
| C                            | 2.356800000  | -1.294400000 | -1.623600000 | C                            | -2.372700000 | 1.731200000  | -0.278000000 |
| N                            | 1.569600000  | -1.294200000 | -0.531700000 | N                            | -1.307800000 | 1.293200000  | 0.423000000  |
| N                            | 1.378400000  | 1.225900000  | 0.358500000  | N                            | -1.235500000 | -1.378700000 | 0.336600000  |
| C                            | 2.092000000  | 2.033600000  | -0.448300000 | C                            | -2.279200000 | -1.811600000 | -0.397800000 |
| C                            | 3.077700000  | 2.864500000  | 0.061600000  | C                            | -3.193300000 | -2.717800000 | 0.118900000  |
| C                            | 3.341000000  | 2.842600000  | 1.429900000  | C                            | -3.035200000 | -3.166400000 | 1.428700000  |
| C                            | 2.605900000  | 1.994100000  | 2.252800000  | C                            | -1.961700000 | -2.700700000 | 2.182300000  |
| Fe                           | 0.069000000  | -0.065300000 | -0.290300000 | Fe                           | -0.012400000 | 0.007400000  | -0.292300000 |
| O                            | -0.035700000 | 0.462700000  | -1.856600000 | O                            | -0.179800000 | 0.016200000  | -2.085500000 |
| O                            | -2.549900000 | 0.864200000  | -2.547400000 | O                            | 0.726900000  | -0.037900000 | -3.418900000 |
| H                            | -1.215600000 | 2.674400000  | -0.768100000 | H                            | 0.794800000  | -2.419100000 | -1.995600000 |
| H                            | -3.096000000 | 3.892300000  | 0.373700000  | H                            | 2.740600000  | -4.021200000 | -1.941400000 |
| H                            | -4.242700000 | 2.798200000  | 2.319000000  | H                            | 4.496600000  | -3.721600000 | -0.173100000 |
| H                            | -3.459500000 | 0.530800000  | 3.078800000  | H                            | 4.244700000  | -1.852100000 | 1.489200000  |
| H                            | -3.177000000 | -3.121700000 | 1.778100000  | H                            | 4.126700000  | 1.991400000  | 1.598000000  |
| H                            | -3.709700000 | -4.455900000 | -0.284900000 | H                            | 4.273600000  | 3.953500000  | 0.033400000  |
| H                            | -2.564600000 | -3.877000000 | -2.440400000 | H                            | 2.512600000  | 4.235700000  | -1.732900000 |
| H                            | -0.925600000 | -1.958900000 | -2.463800000 | H                            | 0.662400000  | 2.531700000  | -1.876600000 |
| H                            | 1.377900000  | -2.167100000 | 2.644700000  | H                            | -0.100400000 | 0.972900000  | 3.491500000  |
| H                            | 0.189800000  | -2.870100000 | 1.533000000  | H                            | 0.825200000  | 1.977000000  | 2.365900000  |
| H                            | -0.086100000 | 0.926000000  | 2.925400000  | H                            | 0.941500000  | -2.086500000 | 2.240700000  |
| H                            | 1.260500000  | -0.144400000 | 3.348400000  | H                            | -0.046500000 | -1.210600000 | 3.418100000  |
| H                            | 3.253500000  | -3.451400000 | 1.423400000  | H                            | -1.984000000 | 2.654400000  | 3.423200000  |
| H                            | 4.738000000  | -3.478100000 | -0.597500000 | H                            | -3.967400000 | 3.491100000  | 2.141400000  |
| H                            | 4.112900000  | -2.061100000 | -2.580700000 | H                            | -4.184100000 | 2.873800000  | -0.291500000 |
| H                            | 2.042400000  | -0.645800000 | -2.438700000 | H                            | -2.433900000 | 1.429300000  | -1.322200000 |
| H                            | 1.847800000  | 1.990800000  | -1.506200000 | H                            | -2.371700000 | -1.404500000 | -1.404400000 |
| H                            | 3.634700000  | 3.510400000  | -0.615700000 | H                            | -4.023900000 | -3.051200000 | -0.502100000 |
| H                            | 4.119100000  | 3.477800000  | 1.853800000  | H                            | -3.747900000 | -3.867000000 | 1.864400000  |
| H                            | 2.786900000  | 1.946900000  | 3.325900000  | H                            | -1.810200000 | -3.024800000 | 3.211400000  |
| H                            | -2.397700000 | 0.207100000  | -1.828500000 | H                            | 1.601900000  | 0.064800000  | -2.964600000 |
| H                            | -1.623500000 | -1.304900000 | 2.830100000  | H                            | 2.728900000  | 0.000900000  | 2.406800000  |
| O                            | -0.022700000 | 3.542000000  | -2.412200000 | O                            | -3.276500000 | -0.305800000 | -3.118700000 |
| O                            | -0.609700000 | 2.576400000  | -3.358300000 | O                            | -2.326500000 | 0.768600000  | -3.510000000 |
| H                            | -0.577700000 | 4.335800000  | -2.627300000 | H                            | -3.182700000 | -0.917600000 | -3.893100000 |
| H                            | -0.465500000 | 1.726200000  | -2.821100000 | H                            | -1.502700000 | 0.462900000  | -3.007700000 |

| ${}^6\text{T}_{\text{homo}}$ |              |              |              | ${}^2\text{P}_{\text{homo}}$ |              |              |              |
|------------------------------|--------------|--------------|--------------|------------------------------|--------------|--------------|--------------|
| C                            | -1.887600000 | 2.334200000  | -1.252600000 | C                            | 1.670300000  | 2.276900000  | 0.450300000  |
| C                            | -2.971800000 | 3.193600000  | -1.098800000 | C                            | 2.697700000  | 3.041400000  | -0.090300000 |
| C                            | -3.814900000 | 3.029200000  | -0.001900000 | C                            | 3.180300000  | 2.734800000  | -1.360600000 |
| C                            | -3.561300000 | 2.010800000  | 0.920400000  | C                            | 2.619400000  | 1.674400000  | -2.075600000 |
| C                            | -2.464100000 | 1.196800000  | 0.700400000  | C                            | 1.608200000  | 0.947900000  | -1.475600000 |
| N                            | -1.652600000 | 1.360600000  | -0.364900000 | N                            | 1.162500000  | 1.242900000  | -0.233000000 |
| C                            | -2.062200000 | 0.019000000  | 1.564200000  | C                            | 0.903100000  | -0.255600000 | -2.056900000 |
| C                            | -2.426200000 | -1.232800000 | 0.793700000  | C                            | 1.418000000  | -1.454700000 | -1.297000000 |
| C                            | -3.508200000 | -2.047900000 | 1.073500000  | C                            | 2.278100000  | -2.422000000 | -1.780600000 |
| C                            | -3.746500000 | -3.136200000 | 0.230500000  | C                            | 2.677500000  | -3.439200000 | -0.911800000 |
| C                            | -2.902300000 | -3.367800000 | -0.852600000 | C                            | 2.195600000  | -3.457800000 | 0.394200000  |
| C                            | -1.832800000 | -2.505700000 | -1.071800000 | C                            | 1.325100000  | -2.458900000 | 0.812900000  |
| N                            | -1.609500000 | -1.464300000 | -0.258800000 | N                            | 0.963000000  | -1.478500000 | -0.024100000 |
| N                            | -0.559000000 | 0.048600000  | 1.647900000  | N                            | -0.548400000 | -0.111000000 | -1.640300000 |
| C                            | 0.013900000  | -1.148800000 | 2.338400000  | C                            | -1.382900000 | -1.321800000 | -1.921600000 |
| C                            | -0.023900000 | 1.326900000  | 2.216200000  | C                            | -1.190900000 | 1.157800000  | -2.107700000 |
| C                            | 1.225500000  | 1.743700000  | 1.496400000  | C                            | -1.960100000 | 1.782500000  | -0.980500000 |
| C                            | 1.334900000  | -1.509600000 | 1.725500000  | C                            | -2.204400000 | -1.670900000 | -0.714800000 |
| C                            | 2.410900000  | -1.976700000 | 2.465000000  | C                            | -3.338500000 | -2.468700000 | -0.778500000 |
| C                            | 3.579500000  | -2.343600000 | 1.797300000  | C                            | -3.988600000 | -2.817500000 | 0.402600000  |
| C                            | 3.632900000  | -2.242800000 | 0.409100000  | C                            | -3.491000000 | -2.354400000 | 1.619200000  |
| C                            | 2.524500000  | -1.756700000 | -0.272300000 | C                            | -2.364200000 | -1.546200000 | 1.622700000  |
| N                            | 1.402200000  | -1.392800000 | 0.375300000  | N                            | -1.739700000 | -1.221600000 | 0.475500000  |
| N                            | 1.298900000  | 1.406800000  | 0.186800000  | N                            | -1.554600000 | 1.454400000  | 0.269500000  |
| C                            | 2.348500000  | 1.798700000  | -0.558700000 | C                            | -2.134400000 | 2.013400000  | 1.347800000  |
| C                            | 3.375500000  | 2.557800000  | -0.015700000 | C                            | -3.152200000 | 2.944900000  | 1.209800000  |
| C                            | 3.317500000  | 2.900100000  | 1.334500000  | C                            | -3.588200000 | 3.287200000  | -0.068700000 |
| C                            | 2.228800000  | 2.487600000  | 2.101300000  | C                            | -2.985800000 | 2.696700000  | -1.176800000 |
| Fe                           | -0.034000000 | -0.064300000 | -0.403200000 | Fe                           | -0.237700000 | 0.018800000  | 0.378200000  |
| O                            | 0.094900000  | -0.034100000 | -2.111300000 | O                            | 0.122700000  | 0.123300000  | 2.002800000  |
| O                            | -0.558200000 | 0.262000000  | -3.759300000 | O                            | 3.643900000  | -0.362700000 | 0.526800000  |
| H                            | -1.189300000 | 2.405000000  | -2.086300000 | H                            | 1.249800000  | 2.457500000  | 1.436900000  |
| H                            | -3.145400000 | 3.980200000  | -1.831600000 | H                            | 3.110400000  | 3.866700000  | 0.488300000  |
| H                            | -4.667000000 | 3.693800000  | 0.141600000  | H                            | 3.985700000  | 3.323400000  | -1.800100000 |
| H                            | -4.196000000 | 1.858600000  | 1.792400000  | H                            | 2.957200000  | 1.416600000  | -3.078400000 |
| H                            | -4.145600000 | -1.841000000 | 1.932000000  | H                            | 2.620300000  | -2.382300000 | -2.813600000 |
| H                            | -4.587600000 | -3.801700000 | 0.425000000  | H                            | 3.355900000  | -4.218100000 | -1.259600000 |
| H                            | -3.063200000 | -4.208500000 | -1.525900000 | H                            | 2.484600000  | -4.241300000 | 1.093200000  |
| H                            | -1.135000000 | -2.632700000 | -1.898300000 | H                            | 0.907000000  | -2.416300000 | 1.816900000  |
| H                            | 0.093300000  | -0.966200000 | 3.418200000  | H                            | -2.009800000 | -1.160600000 | -2.807500000 |
| H                            | -0.671800000 | -1.995800000 | 2.189800000  | H                            | -0.714100000 | -2.167800000 | -2.139500000 |
| H                            | -0.776300000 | 2.116000000  | 2.071600000  | H                            | -0.401600000 | 1.858500000  | -2.417900000 |
| H                            | 0.143600000  | 1.221500000  | 3.296300000  | H                            | -1.827100000 | 0.969600000  | -2.981400000 |
| H                            | 2.334400000  | -2.047500000 | 3.549300000  | H                            | -3.698700000 | -2.813100000 | -1.747400000 |
| H                            | 4.442500000  | -2.699200000 | 2.360200000  | H                            | -4.880000000 | -3.443600000 | 0.372000000  |
| H                            | 4.526200000  | -2.522800000 | -0.147700000 | H                            | -3.971800000 | -2.605100000 | 2.563700000  |
| H                            | 2.520100000  | -1.641700000 | -1.355400000 | H                            | -1.929200000 | -1.138100000 | 2.533100000  |
| H                            | 2.356400000  | 1.462100000  | -1.594700000 | H                            | -1.754600000 | 1.688100000  | 2.314300000  |
| H                            | 4.213500000  | 2.859000000  | -0.642900000 | H                            | -3.599200000 | 3.383900000  | 2.100700000  |
| H                            | 4.118800000  | 3.480300000  | 1.792300000  | H                            | -4.396100000 | 4.006100000  | -0.203400000 |
| H                            | 2.156600000  | 2.736700000  | 3.159300000  | H                            | -3.301200000 | 2.940200000  | -2.190700000 |
| H                            | -1.485900000 | 0.096600000  | -3.449300000 | H                            | 3.813300000  | 0.598100000  | 0.673800000  |
| H                            | -2.529400000 | 0.048300000  | 2.558700000  | H                            | 1.024200000  | -0.345800000 | -3.144300000 |
| O                            | 3.236200000  | -0.008100000 | -3.119600000 | O                            | 2.911200000  | 1.208300000  | 3.104600000  |
| O                            | 2.237500000  | -1.049500000 | -3.475000000 | O                            | 2.663400000  | -0.139000000 | 2.588800000  |
| H                            | 3.228300000  | 0.533100000  | -3.950200000 | H                            | 3.736200000  | 1.027300000  | 3.626300000  |
| H                            | 1.417500000  | -0.660700000 | -3.041700000 | H                            | 1.676000000  | -0.024200000 | 2.312000000  |



| ${}^4P_{\text{homo}}$ |              |              |              | ${}^6P_{\text{homo}}$ |              |              |              |
|-----------------------|--------------|--------------|--------------|-----------------------|--------------|--------------|--------------|
| C                     | -1.587900000 | 2.293800000  | -1.277800000 | C                     | 1.919700000  | -2.206100000 | -1.519600000 |
| C                     | -2.656900000 | 3.181000000  | -1.223900000 | C                     | 2.984300000  | -3.096600000 | -1.423800000 |
| C                     | -3.586000000 | 3.070900000  | -0.192300000 | C                     | 3.779200000  | -3.075200000 | -0.280500000 |
| C                     | -3.430800000 | 2.076900000  | 0.776700000  | C                     | 3.490200000  | -2.171000000 | 0.744100000  |
| C                     | -2.350200000 | 1.223200000  | 0.664200000  | C                     | 2.412700000  | -1.318100000 | 0.578400000  |
| N                     | -1.458600000 | 1.332400000  | -0.351200000 | N                     | 1.650800000  | -1.334200000 | -0.536600000 |
| C                     | -2.012200000 | 0.077000000  | 1.588800000  | C                     | 1.981900000  | -0.273800000 | 1.591000000  |
| C                     | -2.288900000 | -1.196800000 | 0.824000000  | C                     | 2.361100000  | 1.080500000  | 1.023000000  |
| C                     | -3.318400000 | -2.087600000 | 1.060000000  | C                     | 3.410100000  | 1.856400000  | 1.485500000  |
| C                     | -3.418200000 | -3.209900000 | 0.234000000  | C                     | 3.663600000  | 3.072200000  | 0.846100000  |
| C                     | -2.488100000 | -3.403100000 | -0.784400000 | C                     | 2.862700000  | 3.468300000  | -0.222100000 |
| C                     | -1.473100000 | -2.471000000 | -0.967600000 | C                     | 1.826700000  | 2.635000000  | -0.630500000 |
| N                     | -1.395600000 | -1.389700000 | -0.177500000 | N                     | 1.592400000  | 1.464100000  | -0.019000000 |
| N                     | -0.506800000 | 0.126200000  | 1.744200000  | N                     | 0.489300000  | -0.321600000 | 1.650900000  |
| C                     | 0.068200000  | -1.061200000 | 2.452900000  | C                     | -0.122000000 | 0.764900000  | 2.460000000  |
| C                     | 0.004000000  | 1.427500000  | 2.283700000  | C                     | -0.057800000 | -1.658600000 | 2.001300000  |
| C                     | 1.201700000  | 1.864800000  | 1.493200000  | C                     | -1.313800000 | -1.946300000 | 1.222800000  |
| C                     | 1.279400000  | -1.554200000 | 1.717700000  | C                     | -1.409000000 | 1.233800000  | 1.834400000  |
| C                     | 2.270300000  | -2.315400000 | 2.321500000  | C                     | -2.508500000 | 1.619900000  | 2.588300000  |
| C                     | 3.322800000  | -2.796000000 | 1.547200000  | C                     | -3.642700000 | 2.101400000  | 1.935200000  |
| C                     | 3.358500000  | -2.499600000 | 0.186400000  | C                     | -3.643100000 | 2.195200000  | 0.545000000  |
| C                     | 2.350600000  | -1.720400000 | -0.361600000 | C                     | -2.515200000 | 1.783200000  | -0.151600000 |
| N                     | 1.333000000  | -1.266100000 | 0.394000000  | N                     | -1.426100000 | 1.306800000  | 0.481500000  |
| N                     | 1.282500000  | 1.390700000  | 0.226300000  | N                     | -1.369700000 | -1.456000000 | -0.037400000 |
| C                     | 2.295500000  | 1.757000000  | -0.580700000 | C                     | -2.438800000 | -1.712500000 | -0.815200000 |
| C                     | 3.268900000  | 2.644100000  | -0.144700000 | C                     | -3.499200000 | -2.485500000 | -0.363700000 |
| C                     | 3.201400000  | 3.141800000  | 1.155100000  | C                     | -3.453700000 | -2.990100000 | 0.934900000  |
| C                     | 2.156700000  | 2.743100000  | 1.985200000  | C                     | -2.348500000 | -2.715300000 | 1.738700000  |
| Fe                    | -0.013500000 | 0.005400000  | -0.234700000 | Fe                    | -0.011300000 | 0.079100000  | -0.491600000 |
| O                     | 0.277800000  | -0.071500000 | -1.881600000 | O                     | 0.077800000  | 0.403900000  | -2.331800000 |
| O                     | -1.703400000 | -0.247800000 | -3.293200000 | O                     | 1.299000000  | 0.587700000  | -3.101600000 |
| H                     | -0.828400000 | 2.314000000  | -2.056800000 | H                     | 1.262600000  | -2.170400000 | -2.388200000 |
| H                     | -2.751000000 | 3.949500000  | -1.989900000 | H                     | 3.178800000  | -3.795300000 | -2.236000000 |
| H                     | -4.426900000 | 3.761800000  | -0.133400000 | H                     | 4.617100000  | -3.765100000 | -0.178900000 |
| H                     | -4.126500000 | 1.970700000  | 1.607200000  | H                     | 4.082400000  | -2.137400000 | 1.657700000  |
| H                     | -4.016400000 | -1.911900000 | 1.876600000  | H                     | 4.009300000  | 1.522700000  | 2.331600000  |
| H                     | -4.216400000 | -3.934300000 | 0.394700000  | H                     | 4.479700000  | 3.708600000  | 1.188400000  |
| H                     | -2.539500000 | -4.271000000 | -1.440300000 | H                     | 3.031100000  | 4.413000000  | -0.737400000 |
| H                     | -0.716800000 | -2.552900000 | -1.745300000 | H                     | 1.166300000  | 2.886000000  | -1.460000000 |
| H                     | 0.296300000  | -0.812500000 | 3.496600000  | H                     | -0.275800000 | 0.441800000  | 3.499200000  |
| H                     | -0.682700000 | -1.865100000 | 2.460200000  | H                     | 0.568600000  | 1.621400000  | 2.478700000  |
| H                     | -0.782500000 | 2.188300000  | 2.173600000  | H                     | 0.683100000  | -2.426200000 | 1.732700000  |
| H                     | 0.229700000  | 1.337900000  | 3.353400000  | H                     | -0.233900000 | -1.737900000 | 3.083500000  |
| H                     | 2.210000000  | -2.524200000 | 3.388900000  | H                     | -2.476700000 | 1.538000000  | 3.674300000  |
| H                     | 4.112200000  | -3.391800000 | 2.005200000  | H                     | -4.521200000 | 2.395700000  | 2.509600000  |
| H                     | 4.165300000  | -2.853700000 | -0.453500000 | H                     | -4.508100000 | 2.569500000  | -0.000700000 |
| H                     | 2.337300000  | -1.444000000 | -1.412600000 | H                     | -2.466500000 | 1.818900000  | -1.239900000 |
| H                     | 2.311600000  | 1.306300000  | -1.572300000 | H                     | -2.433800000 | -1.255600000 | -1.805200000 |
| H                     | 4.075600000  | 2.924900000  | -0.820400000 | H                     | -4.349600000 | -2.672300000 | -1.017800000 |
| H                     | 3.962700000  | 3.828300000  | 1.525200000  | H                     | -4.278800000 | -3.586300000 | 1.325300000  |
| H                     | 2.076100000  | 3.104400000  | 3.009600000  | H                     | -2.288200000 | -3.089200000 | 2.760200000  |
| H                     | -2.157500000 | -0.186900000 | -2.414700000 | H                     | 2.006000000  | 0.481300000  | -2.412200000 |
| H                     | -2.538000000 | 0.127000000  | 2.550900000  | H                     | 2.449700000  | -0.444800000 | 2.571800000  |
| O                     | 3.041900000  | 0.052200000  | -3.371200000 | O                     | -2.939800000 | 0.473400000  | -3.260500000 |
| O                     | 1.950100000  | -0.889100000 | -3.731700000 | O                     | -2.000200000 | 1.593400000  | -3.535100000 |
| H                     | 2.909800000  | 0.751200000  | -4.061600000 | H                     | -2.923000000 | 0.007400000  | -4.135400000 |
| H                     | 1.236500000  | -0.577300000 | -3.081200000 | H                     | -1.149900000 | 1.183300000  | -3.176700000 |

## References

- (1) Stoll, S.; Schweiger, A. EasySpin, a Comprehensive Software Package for Spectral Simulation and Analysis in EPR. *J. Magn. Reson.* **2006**, *178* (1), 42–55.
- (2) Nash, T. The Colorimetric Estimation of Formaldehyde by Means of the Hantzsch Reaction. *Biochem. J.* **1953**, *55* (3), 416–421.
- (3) Sato, T.; Hamada, Y.; Sumikawa, M.; Araki, S.; Yamamoto, H. Solubility of Oxygen in Organic Solvents and Calculation of the Hansen Solubility Parameters of Oxygen. *Ind. Eng. Chem. Res.* **2014**, *53* (49), 19331–19337.
- (4) Battino, R.; Rettich, T. R.; Tominaga, T. The Solubility of Oxygen and Ozone in Liquids. *J. Phys. Chem. Ref. Data* **1983**, *12* (2), 163–178.
- (5) Braymer, J. J.; O'Neill, K. P.; Rohde, J. U.; Lim, M. H. The Reaction of a High-Valent Nonheme Oxoiron(IV) Intermediate with Hydrogen Peroxide. *Angew. Chem. - Int. Ed.* **2012**, *51* (22), 5376–5380.
